# Supplementary material for: Highly enantioselective dynamic kinetic resolution and desymmetrization processes by cyclocondensation of chiral aminoalcohols with racemic or prochiral δ-oxoacid derivatives
Source: Royal Society of Chemistry journal article supplement (doi:10.1039/b413937b), 2005-01-01

# ELECTRONIC SUPPLEMENTARY INFORMATION (ESI)

## Highly Enantioselective Dynamic Kinetic Resolution and Desymmetrization Processes by Cyclocondensation of Chiral Aminoalcohols with Racemic or Prochiral $\delta$ -Oxoacid Derivatives

Mercedes Amat, Oriol Bassas, Miquel A. Pericàs, Mireia Pastó, and Joan Bosch

*<sup>a</sup> Laboratory of Organic Chemistry, Faculty of Pharmacy, and Barcelona Science Park / Department of  
Organic Chemistry, University of Barcelona, 08028-Barcelona, Spain*

### Contents:

- Typical experimental procedure Page 2
- <sup>1</sup>H and <sup>13</sup>C NMR spectra of new compounds Page 3

### **Typical experimental procedure**

The chiral aminoalcohol (1.1 equiv) was added to a 0.3 M solution of the  $\gamma$ -oxo-acid derivative in anhydrous toluene, and the resulting mixture was heated at reflux with azeotropic removal of water produced with a Dean-Stark until no starting material was detected by TLC. The resulting crude mixture was concentrated under vacuum, the residue was dissolved in AcOEt, and the solution was poured into a 5% aqueous solution of NaHCO<sub>3</sub>. The aqueous layer was extracted with AcOEt, and the combined organic extracts were dried (Na<sub>2</sub>SO<sub>4</sub>) and concentrated to give an oil, which was subjected to flash column chromatography (SiO<sub>2</sub>). In some cases the SiO<sub>2</sub> was previously washed with a solution of Et<sub>3</sub>N in hexane.

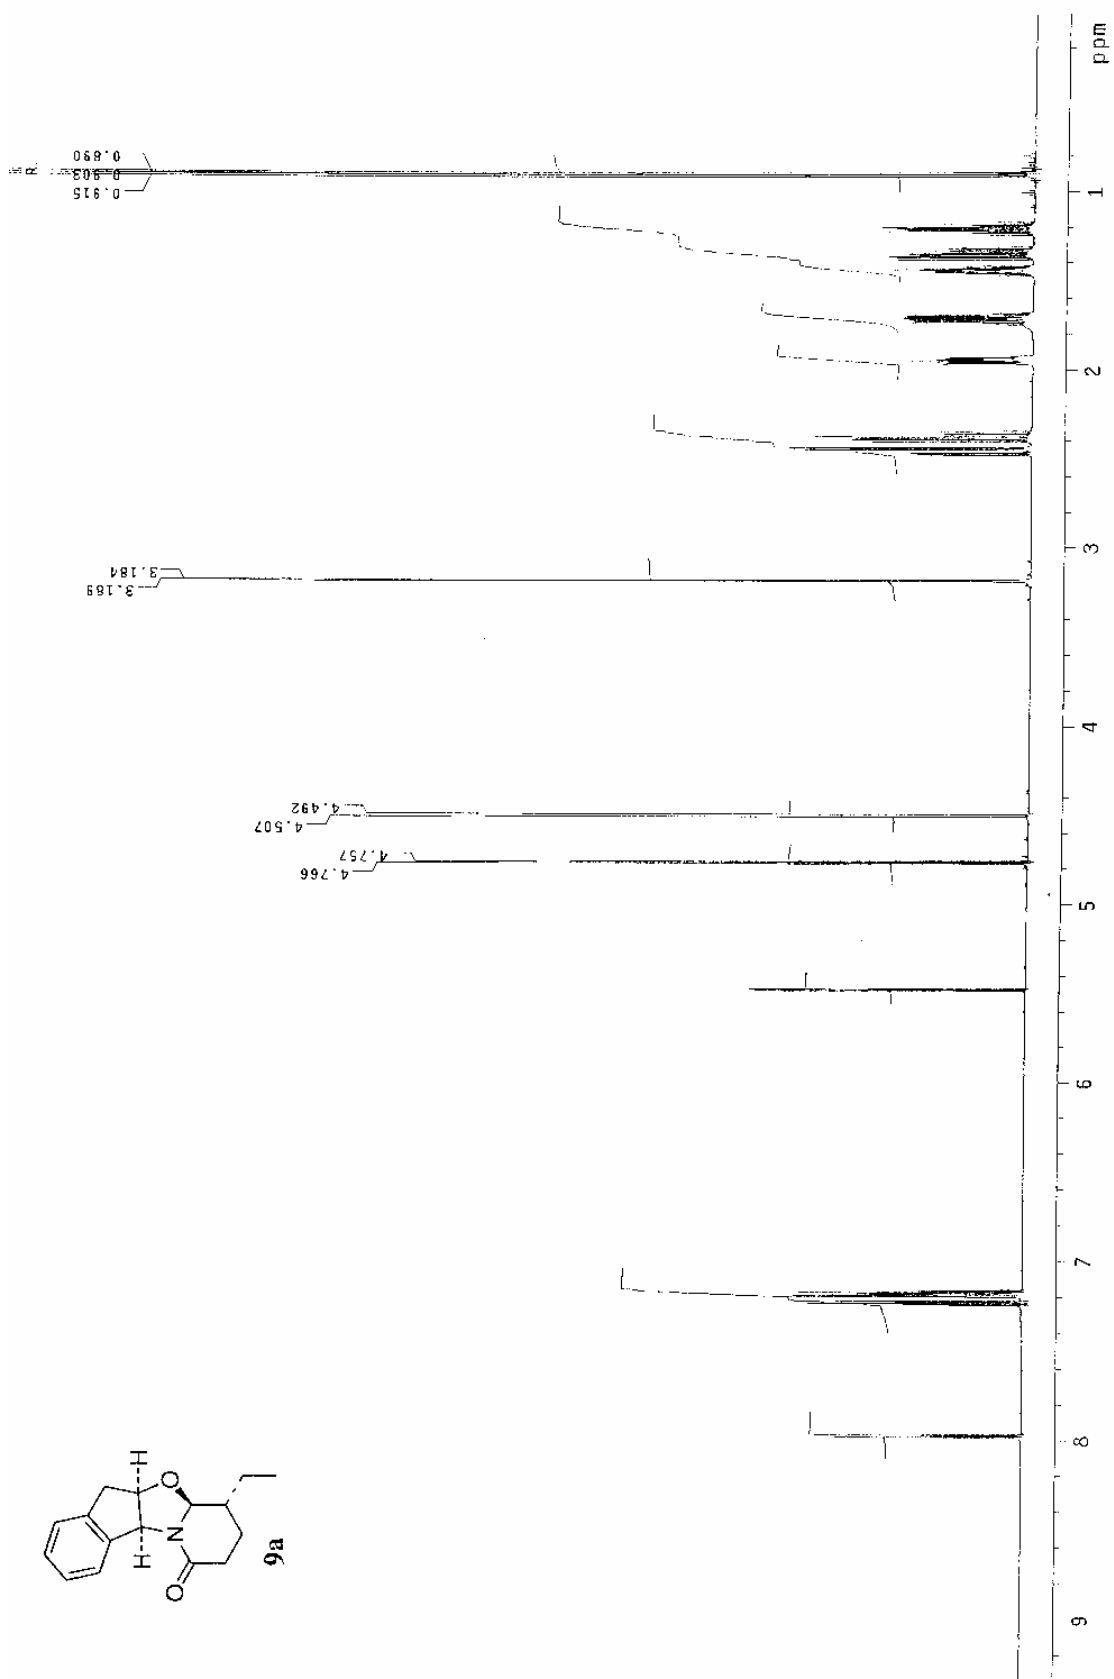

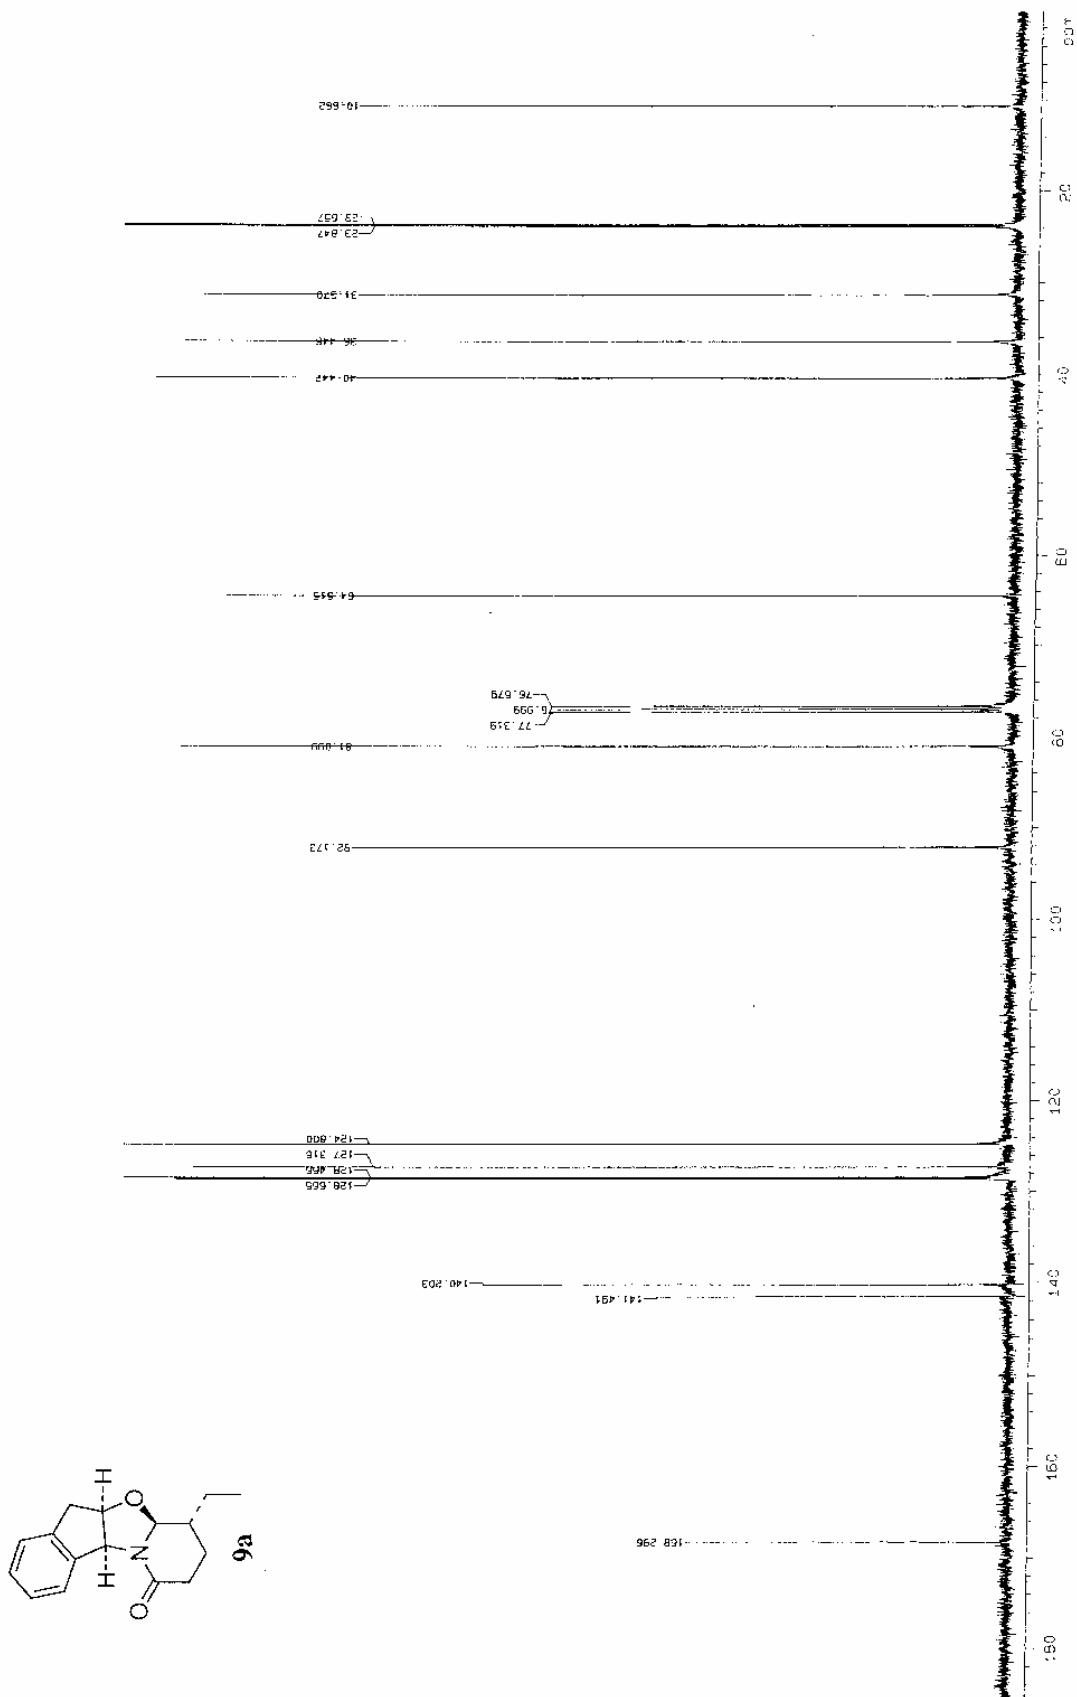

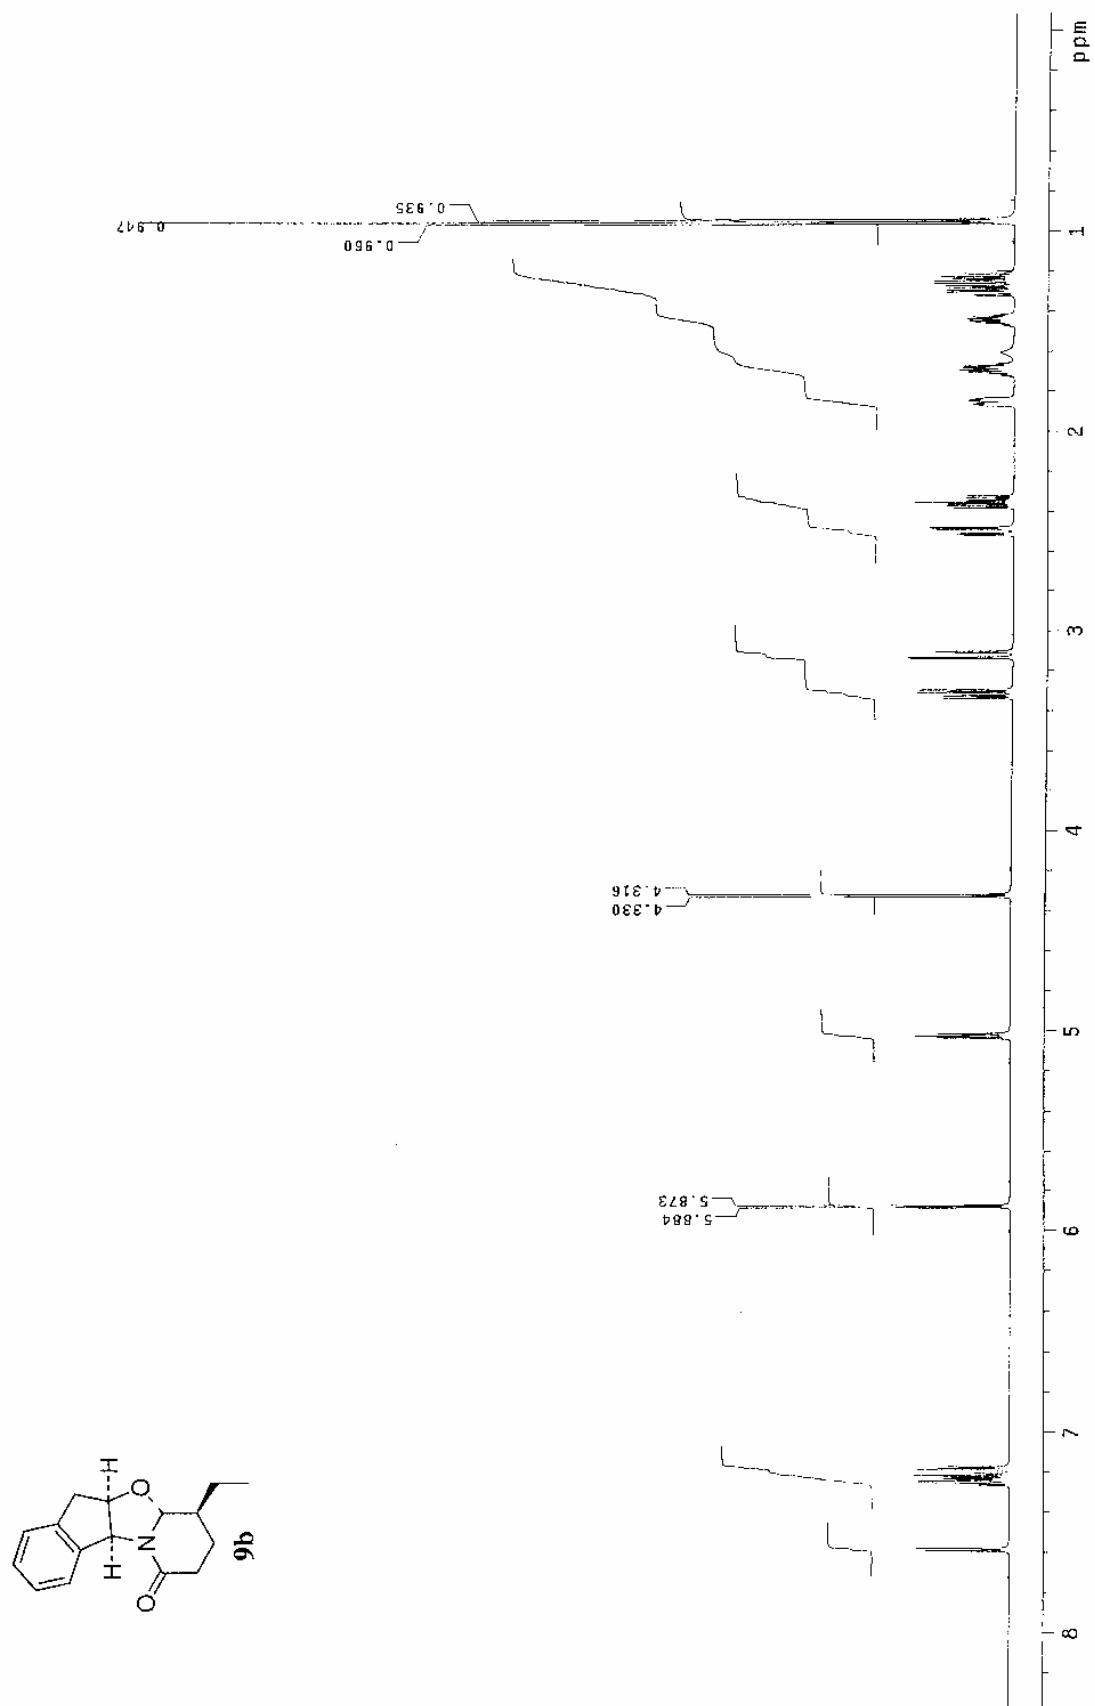

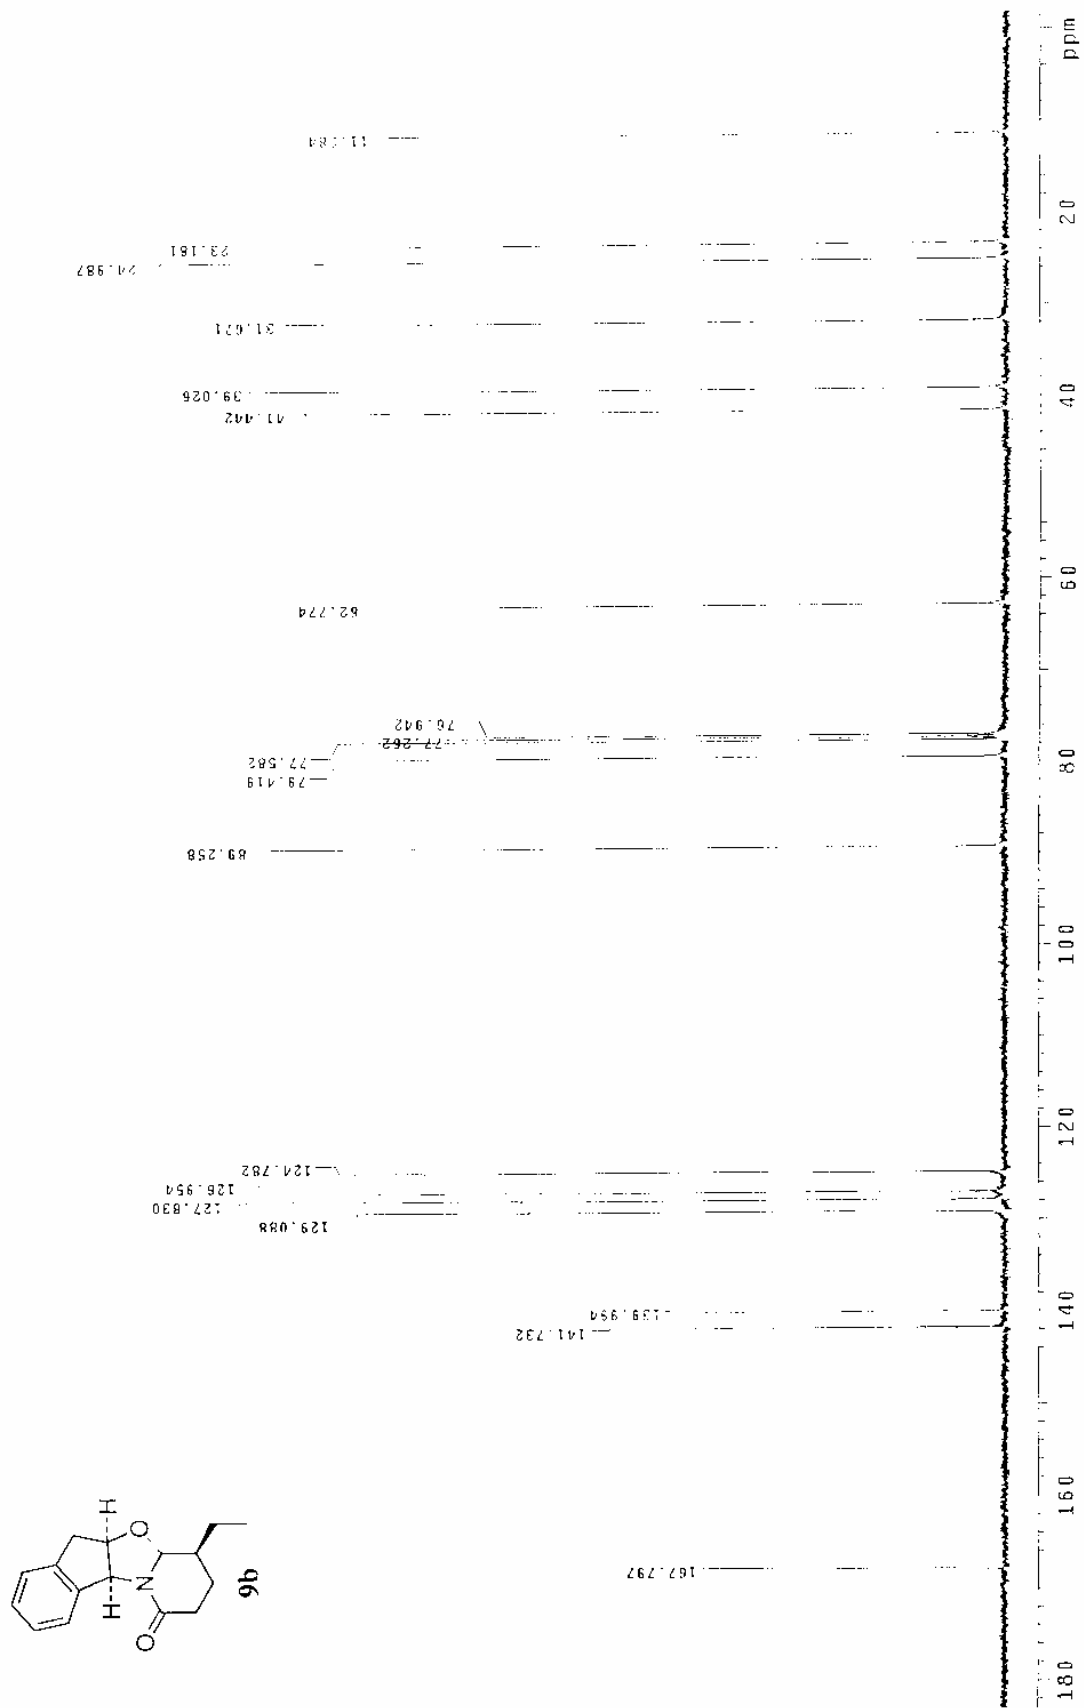

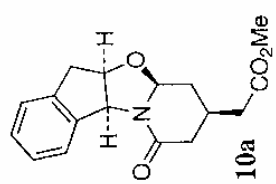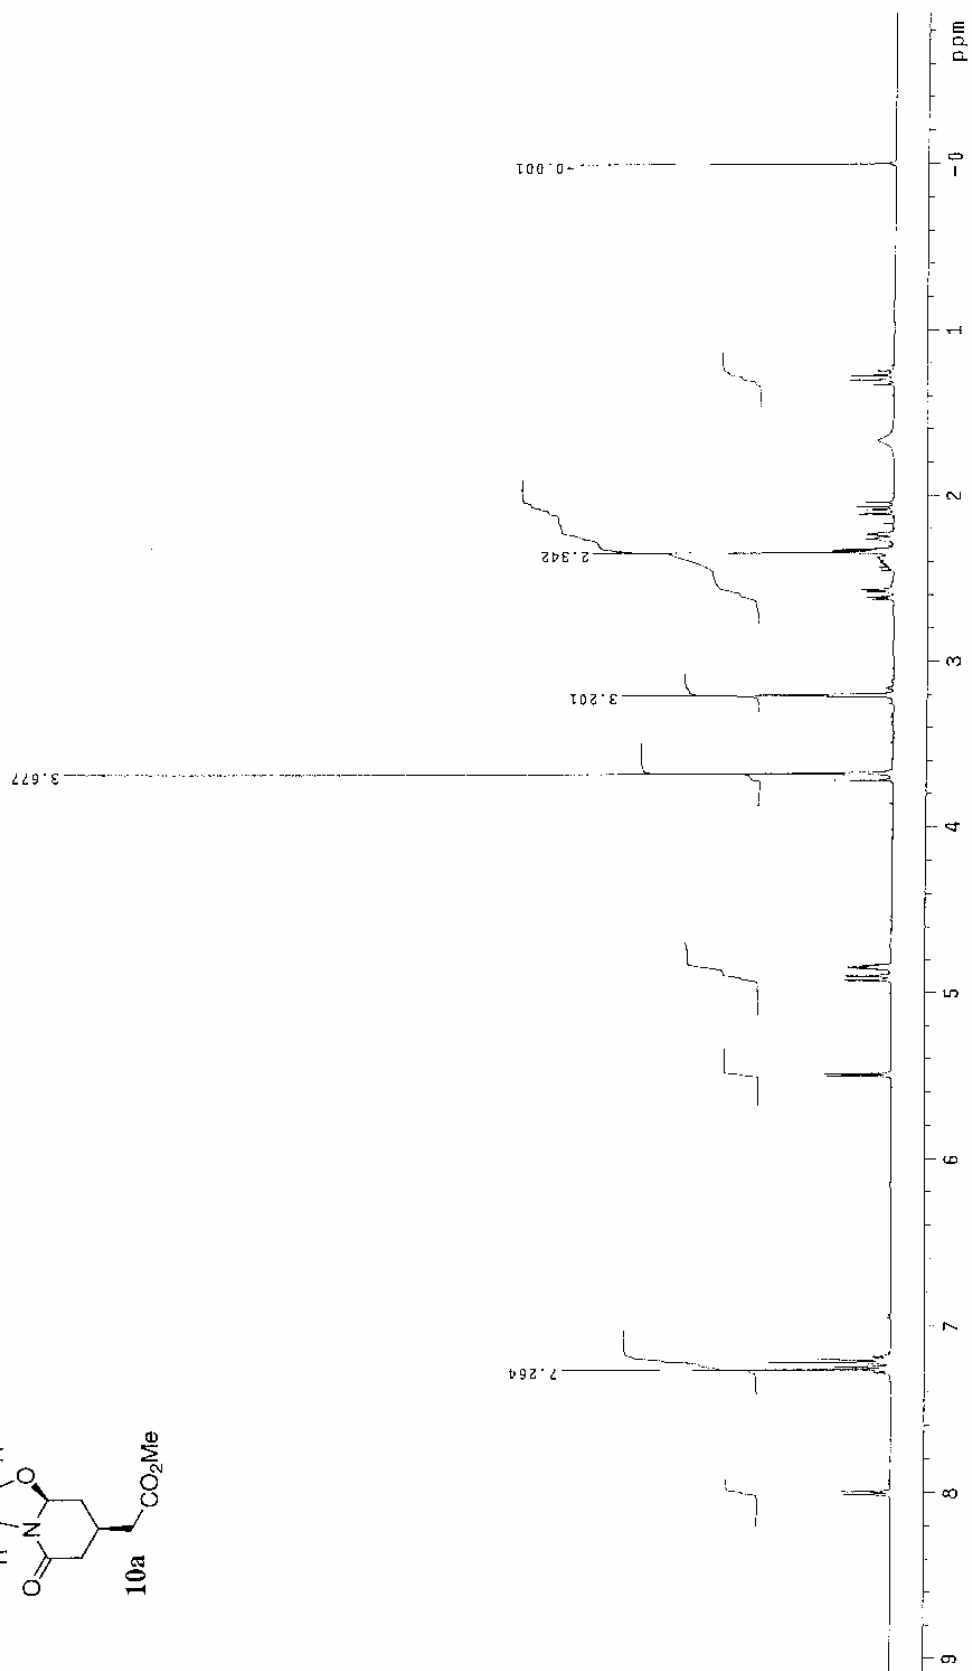

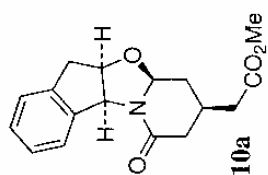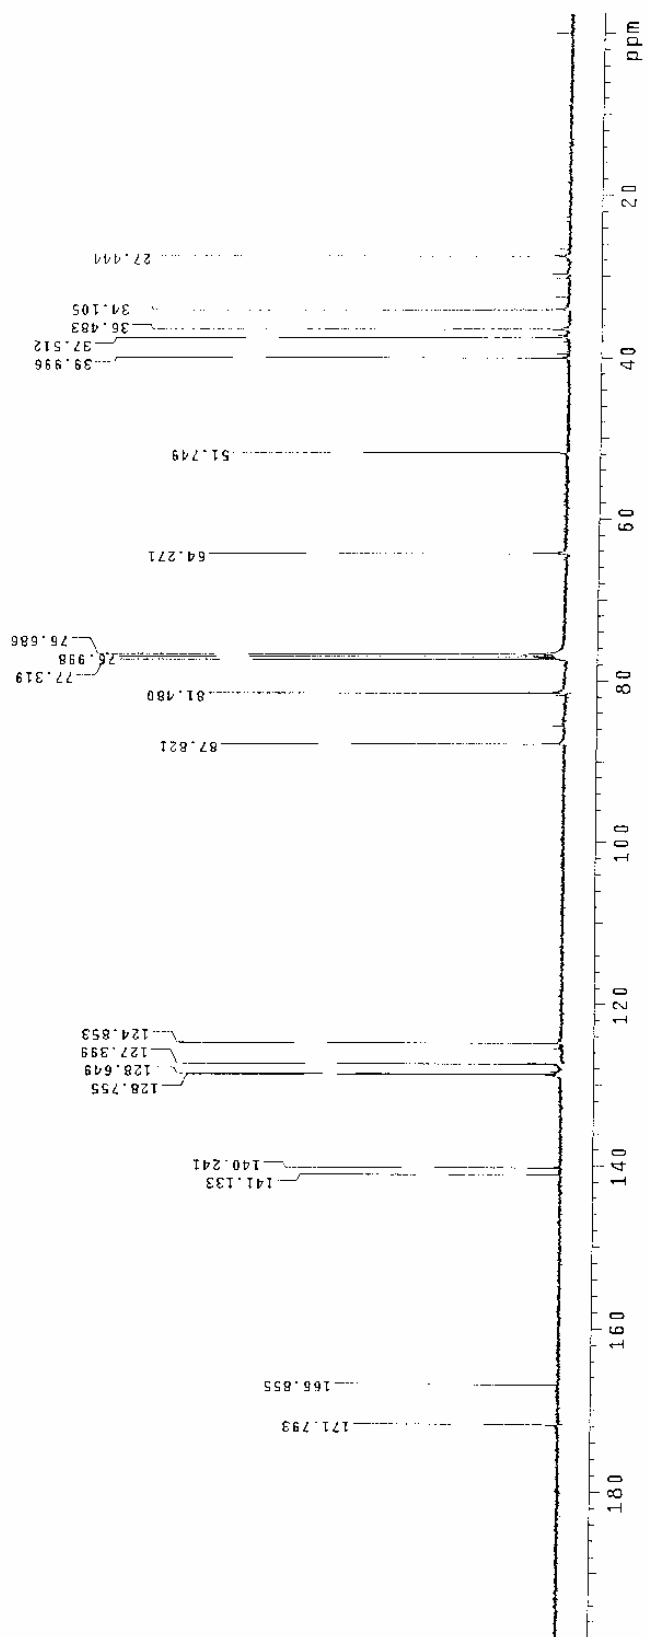



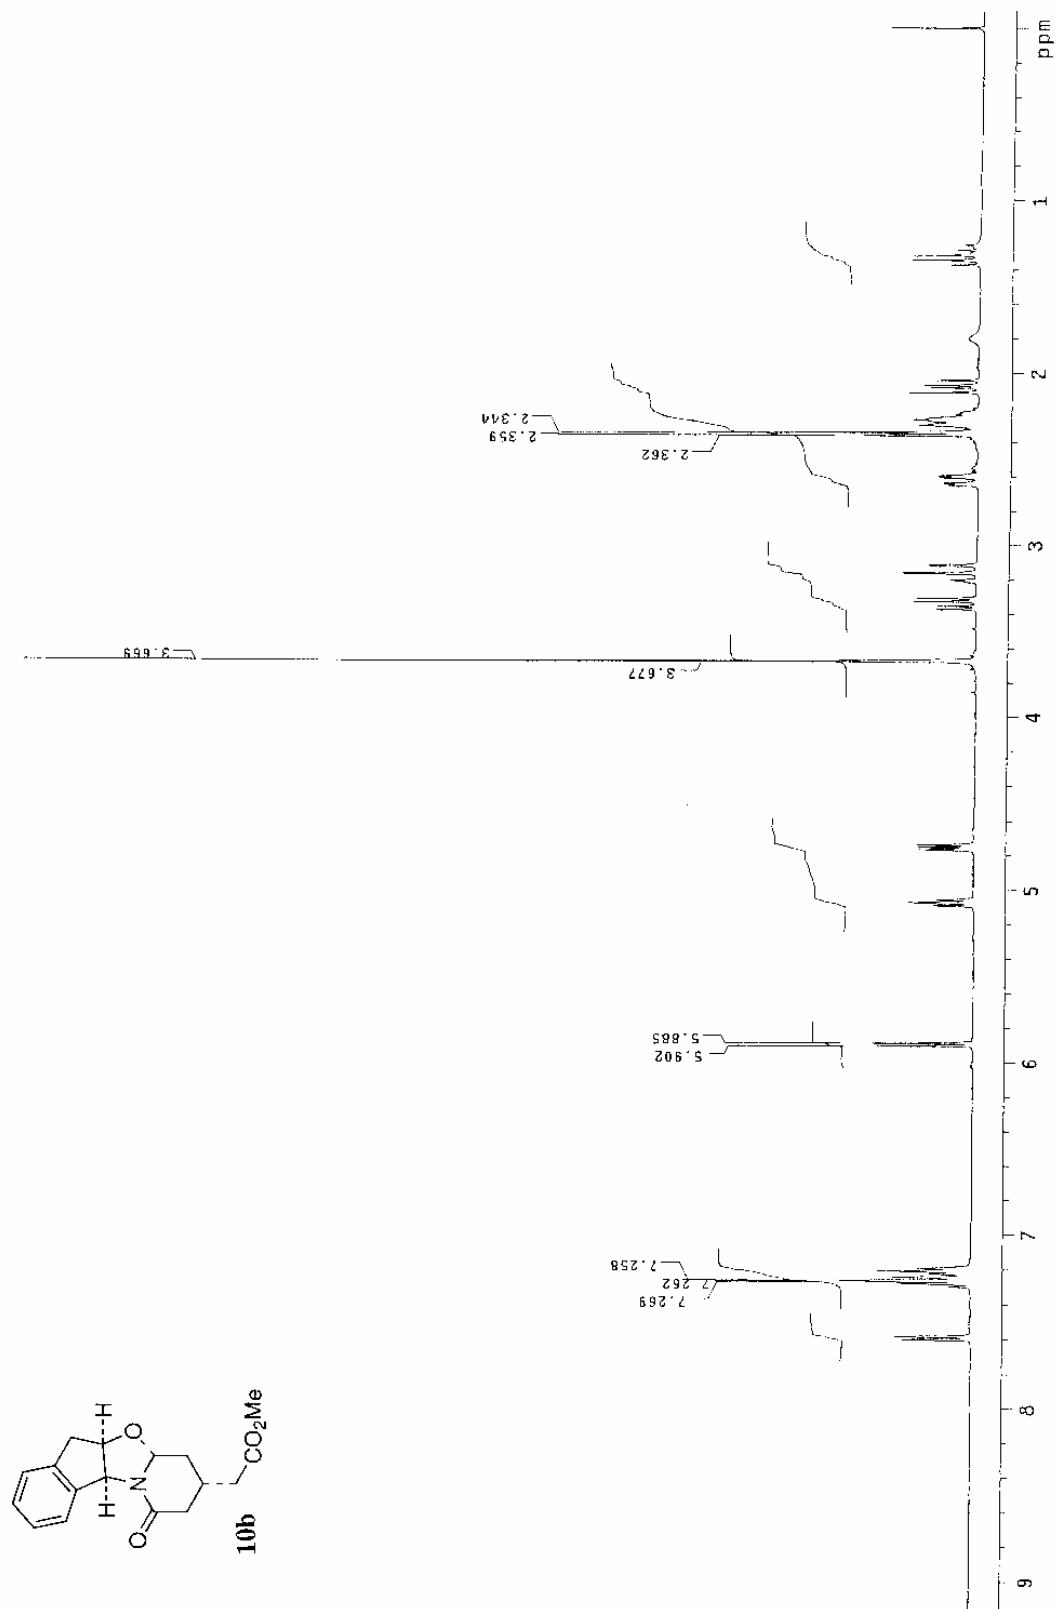

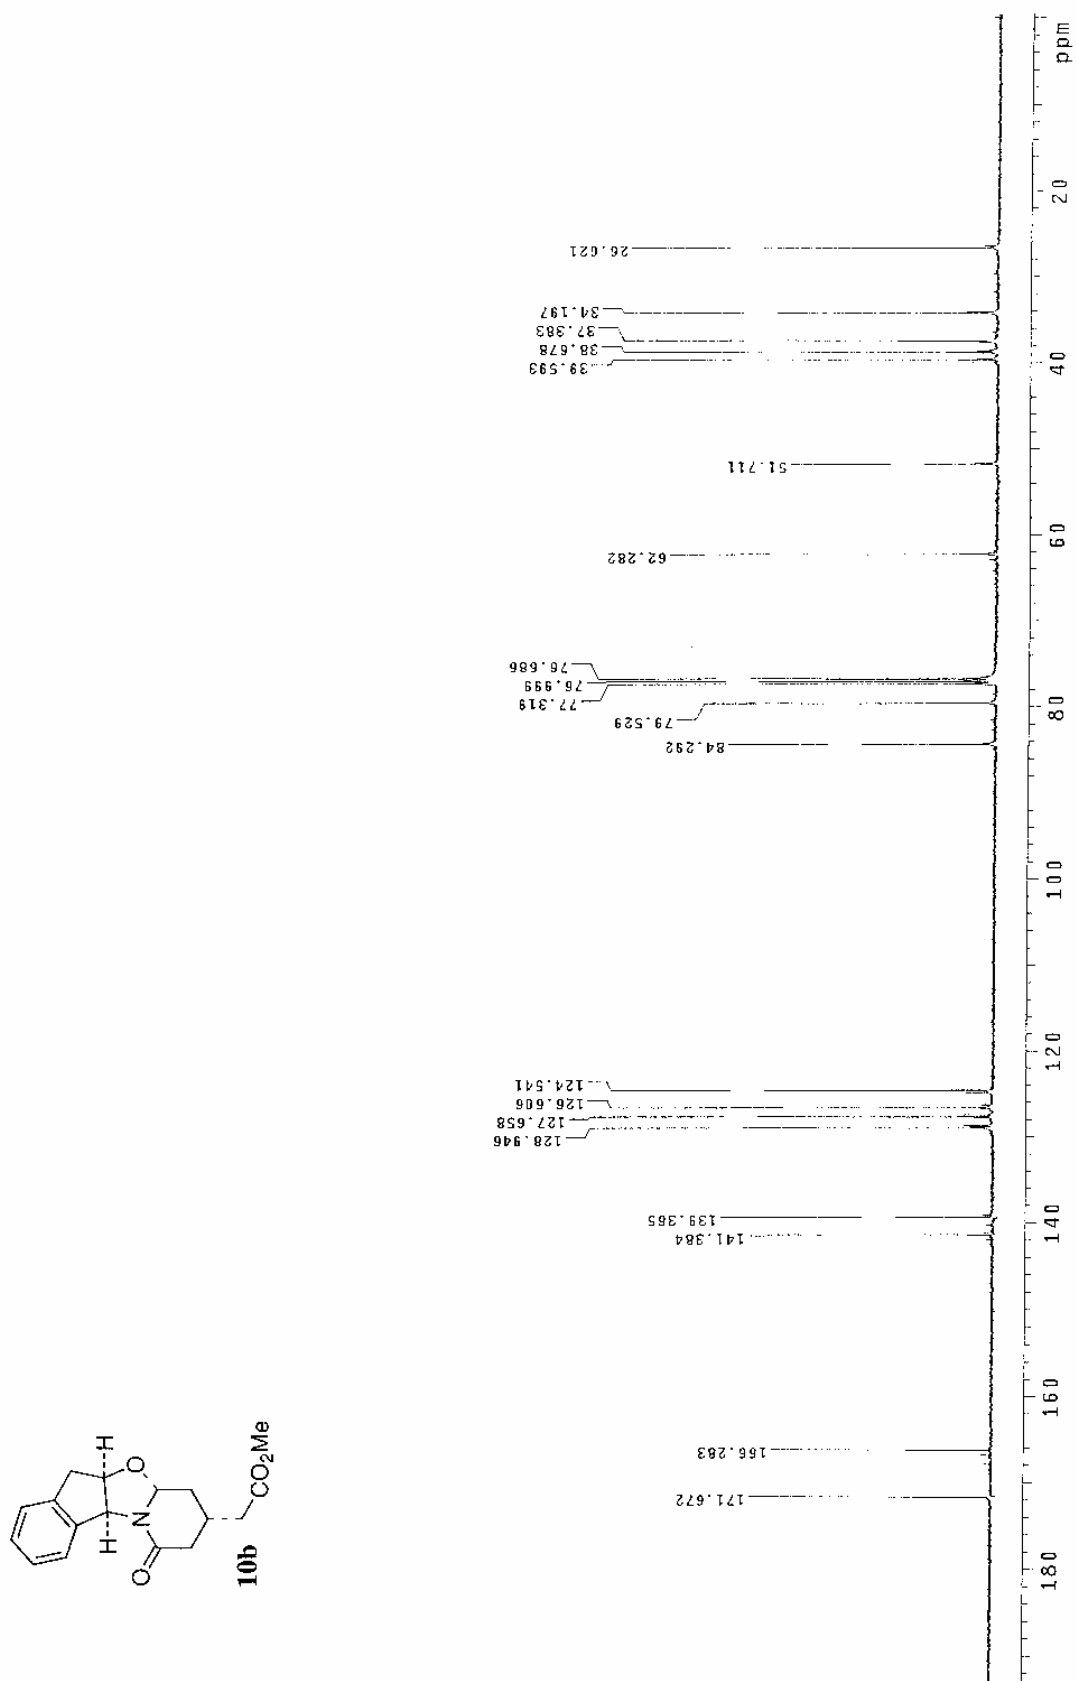

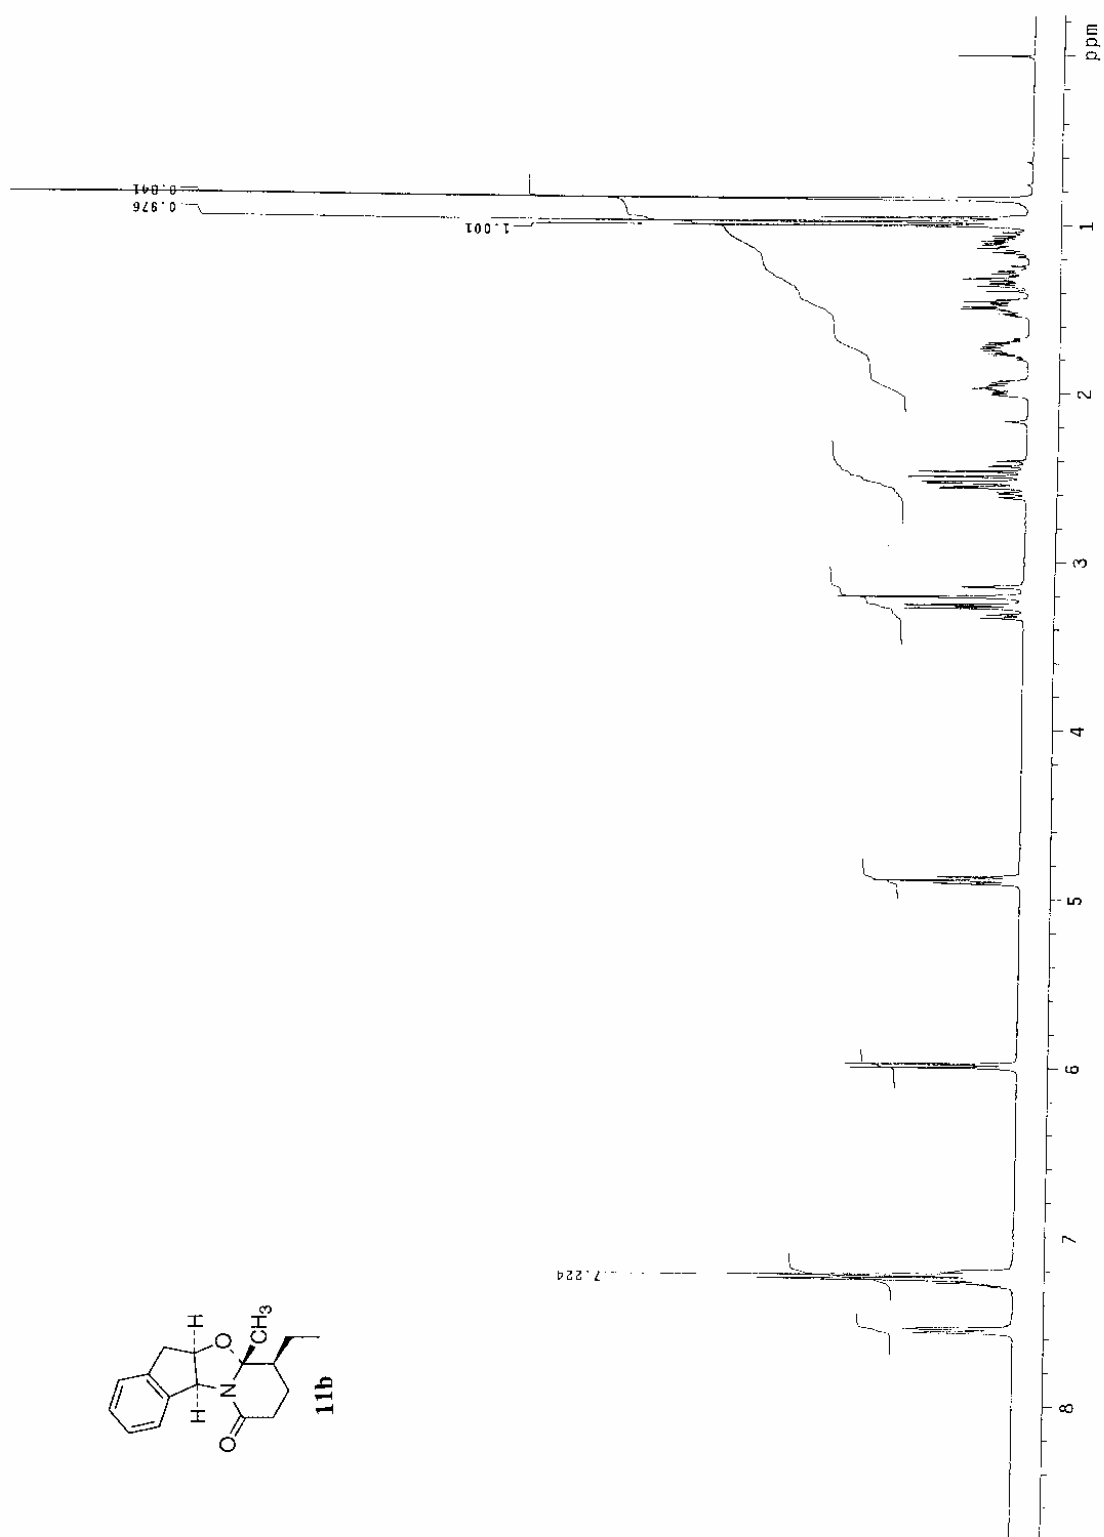

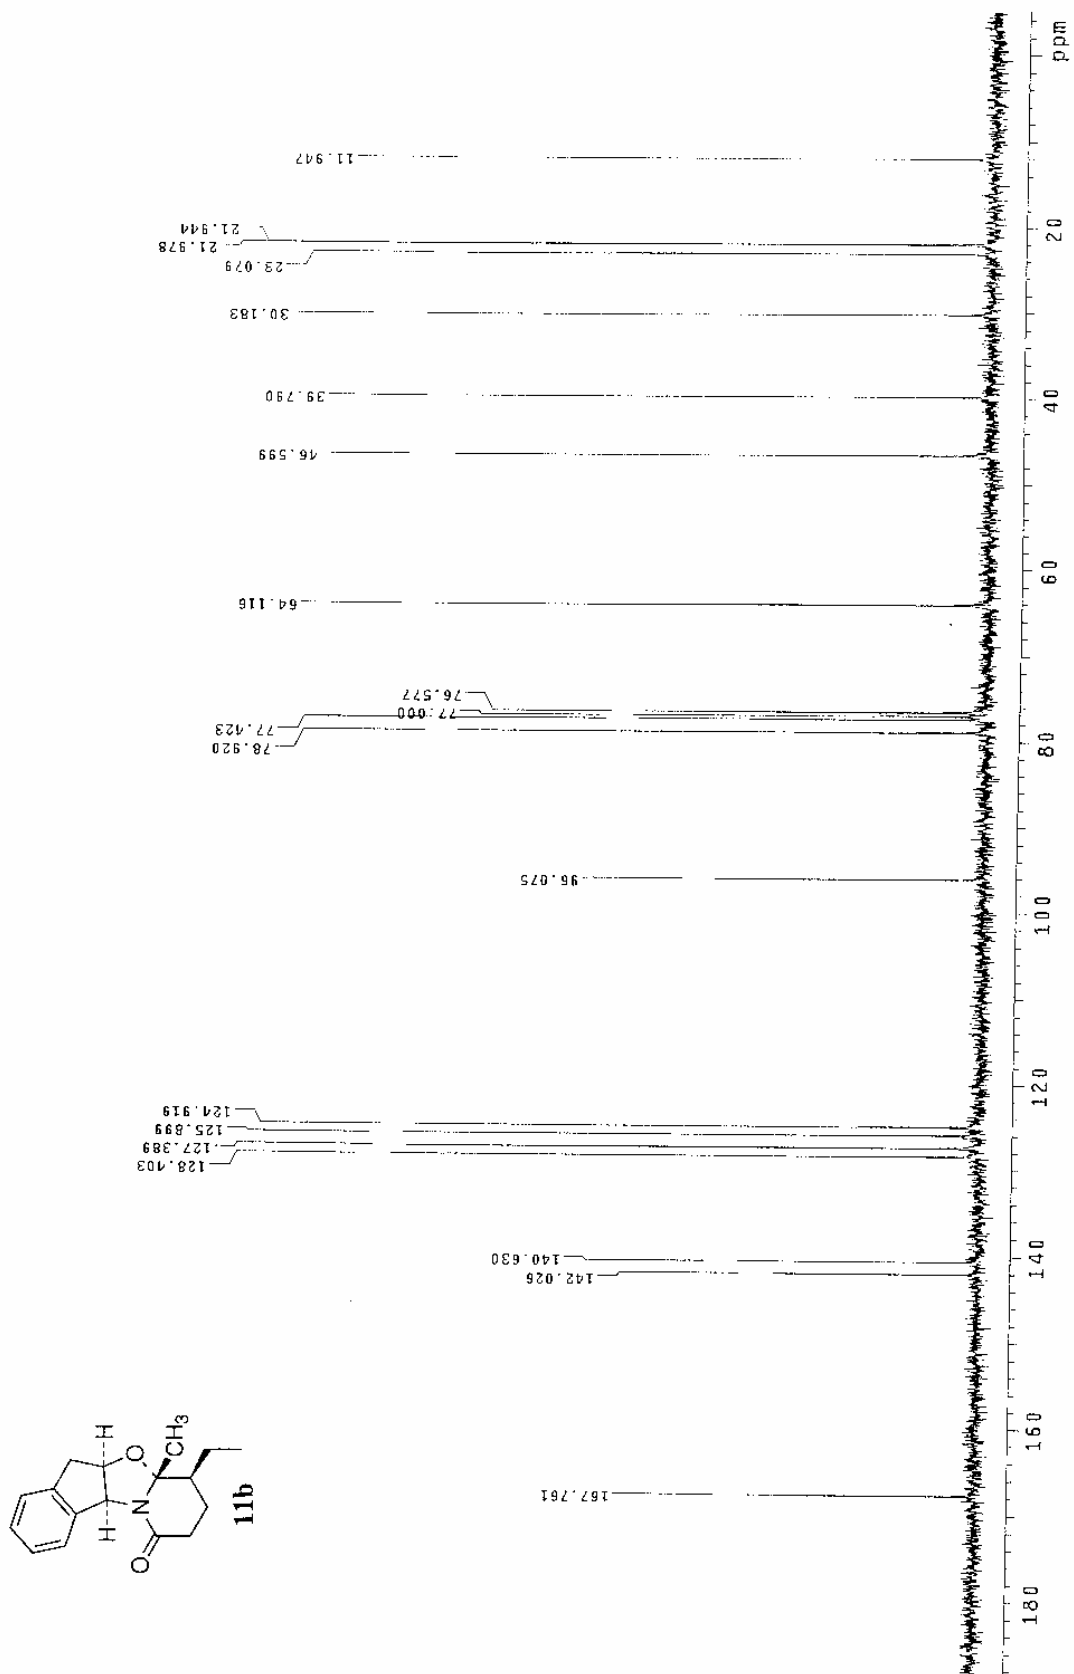

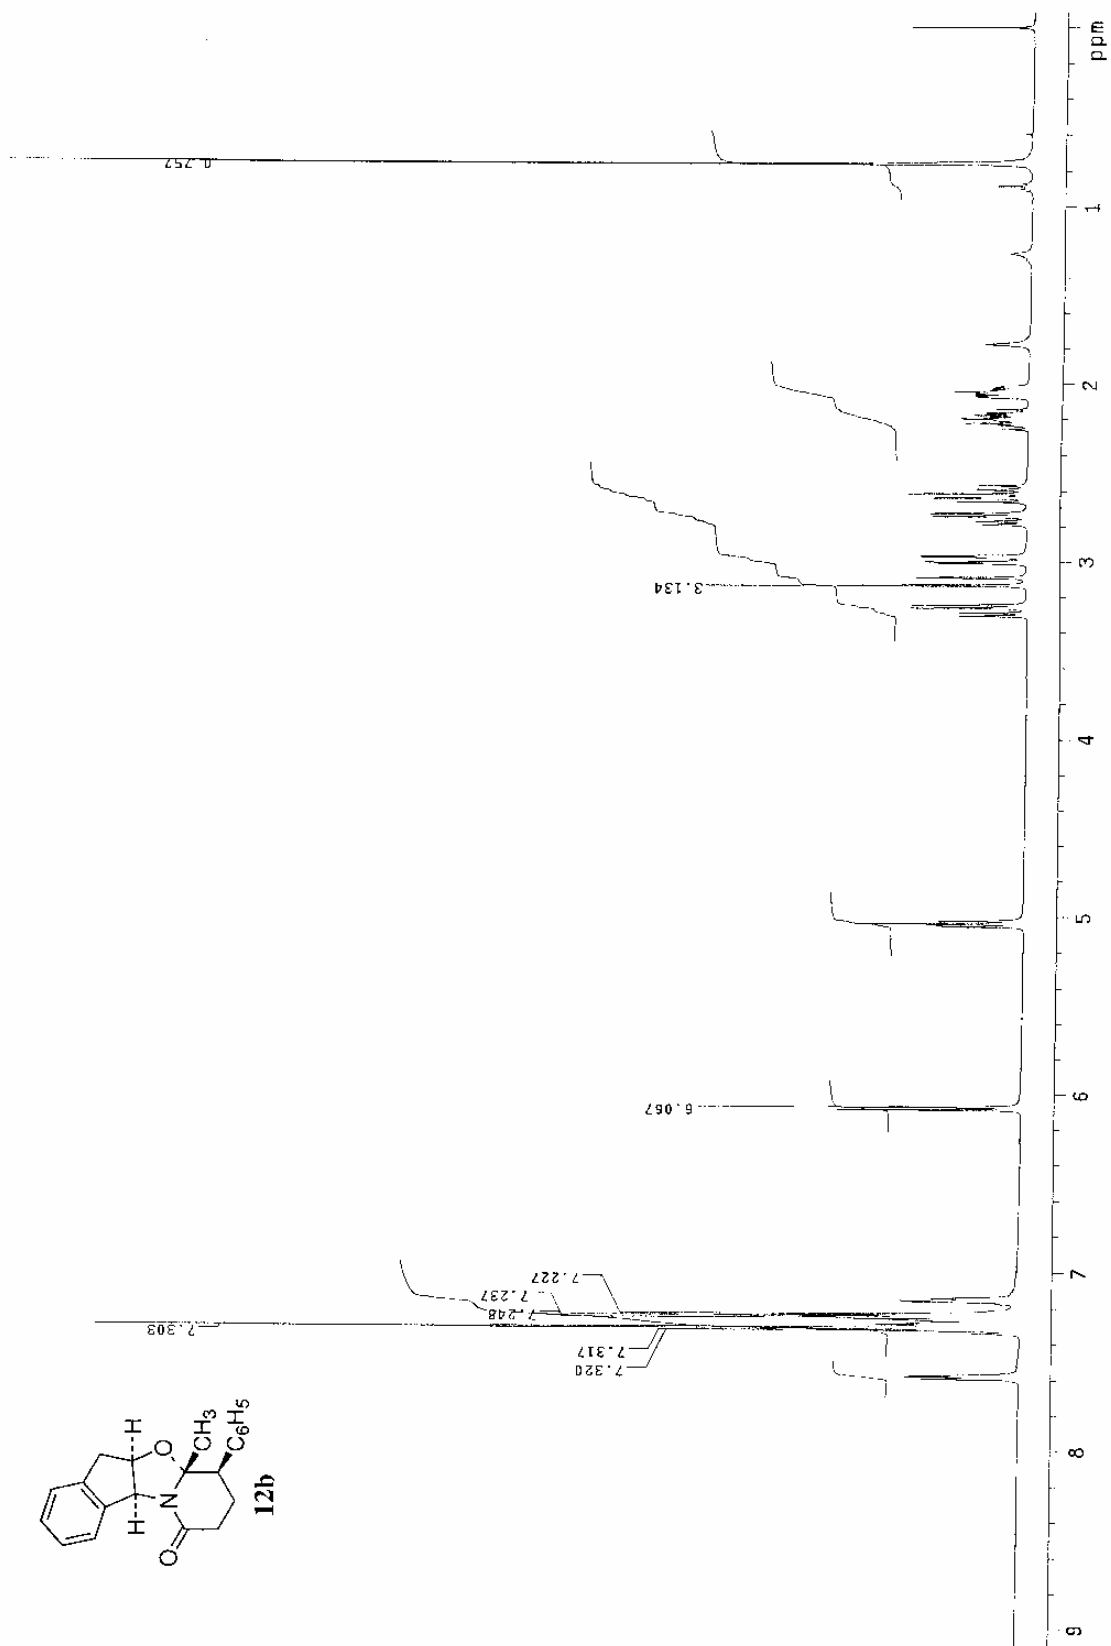

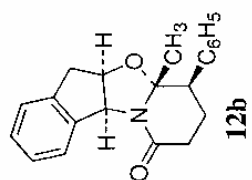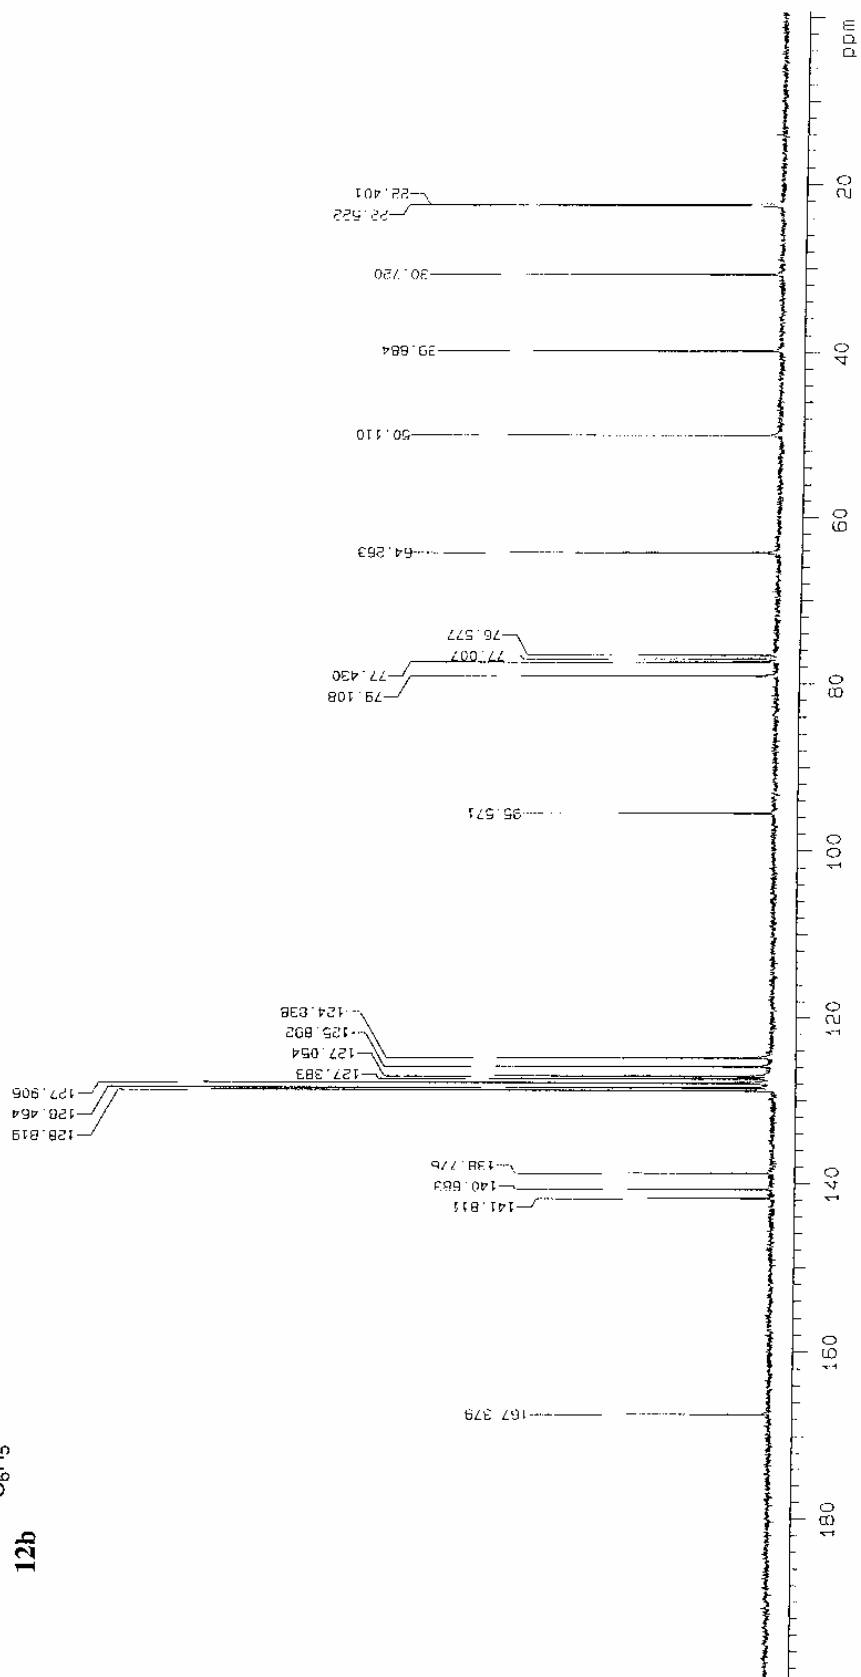

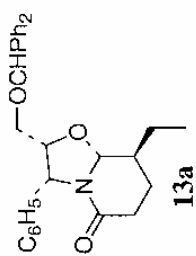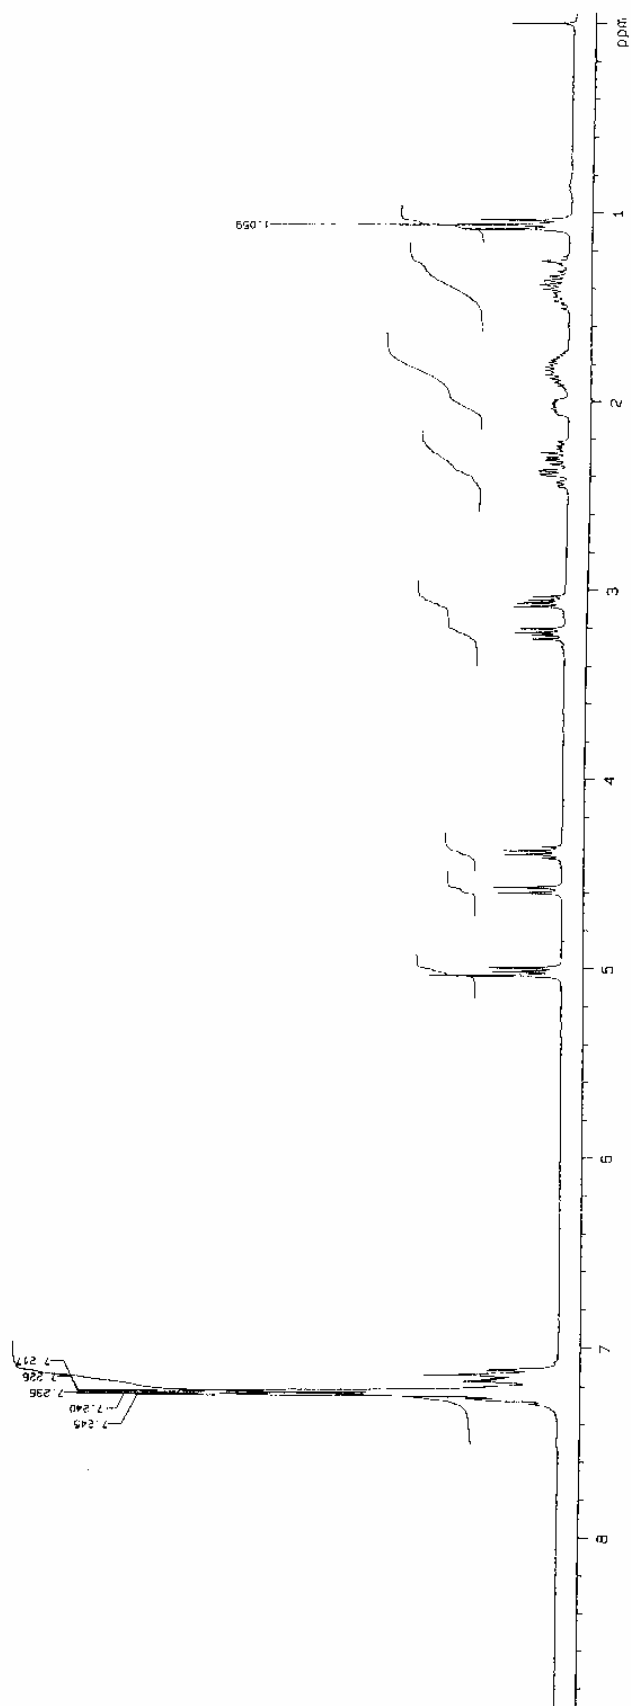

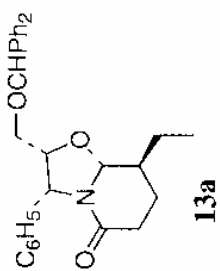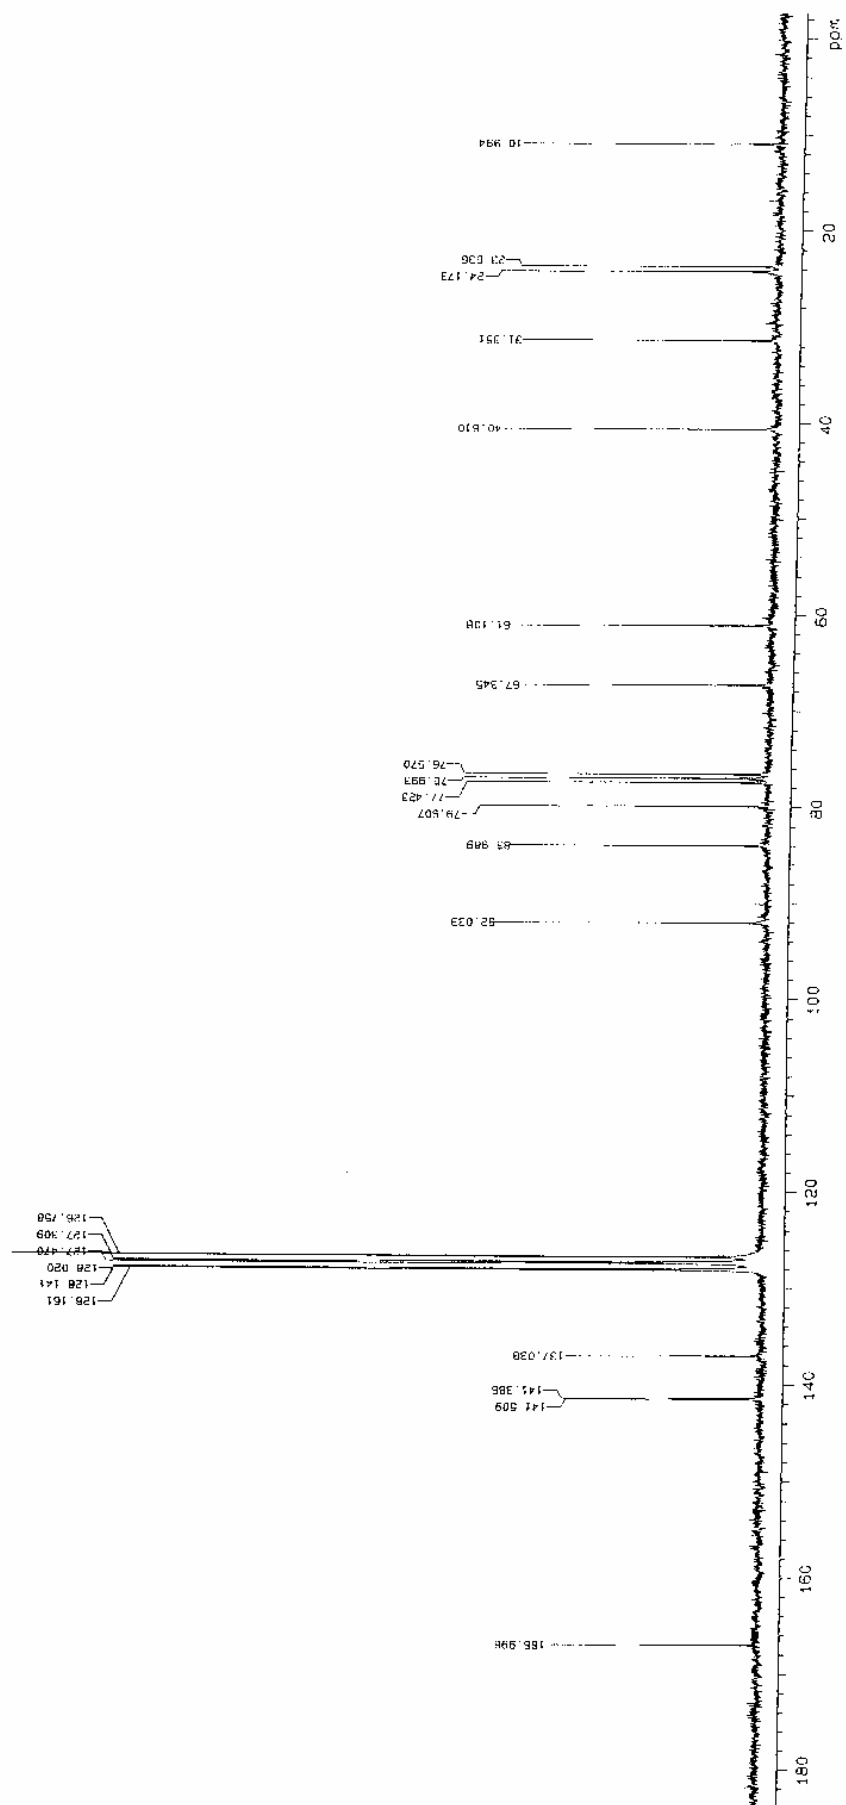



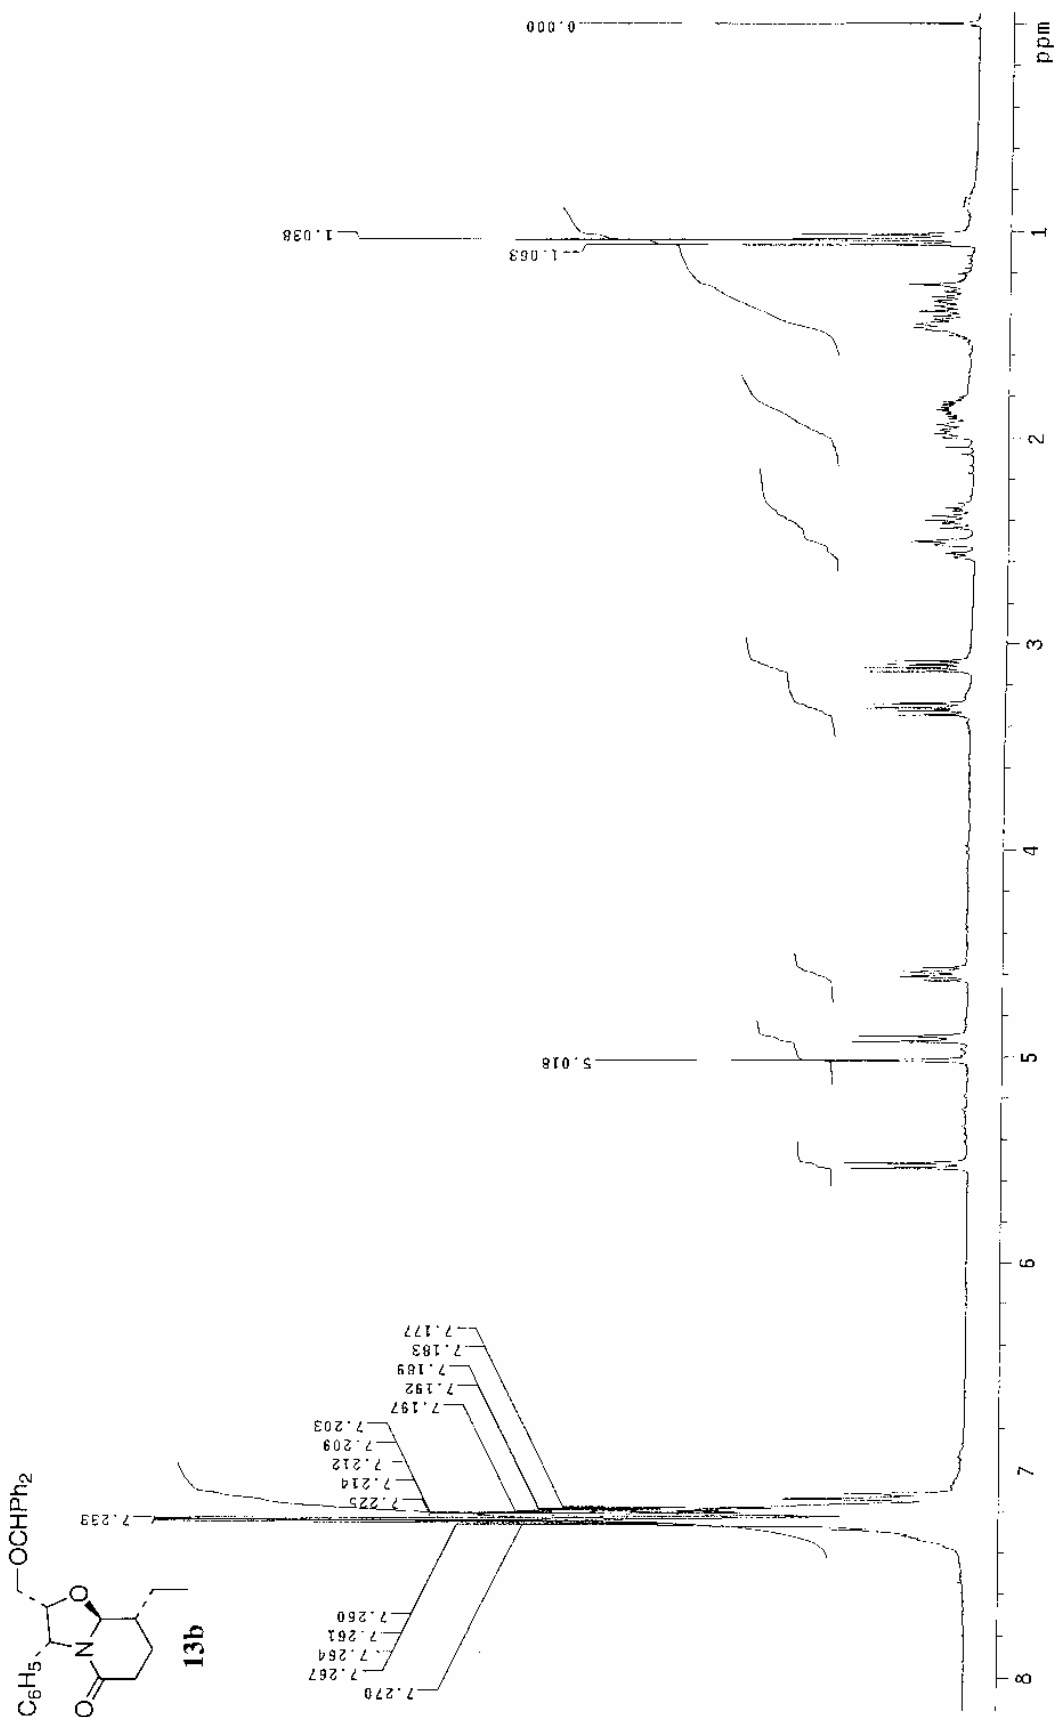

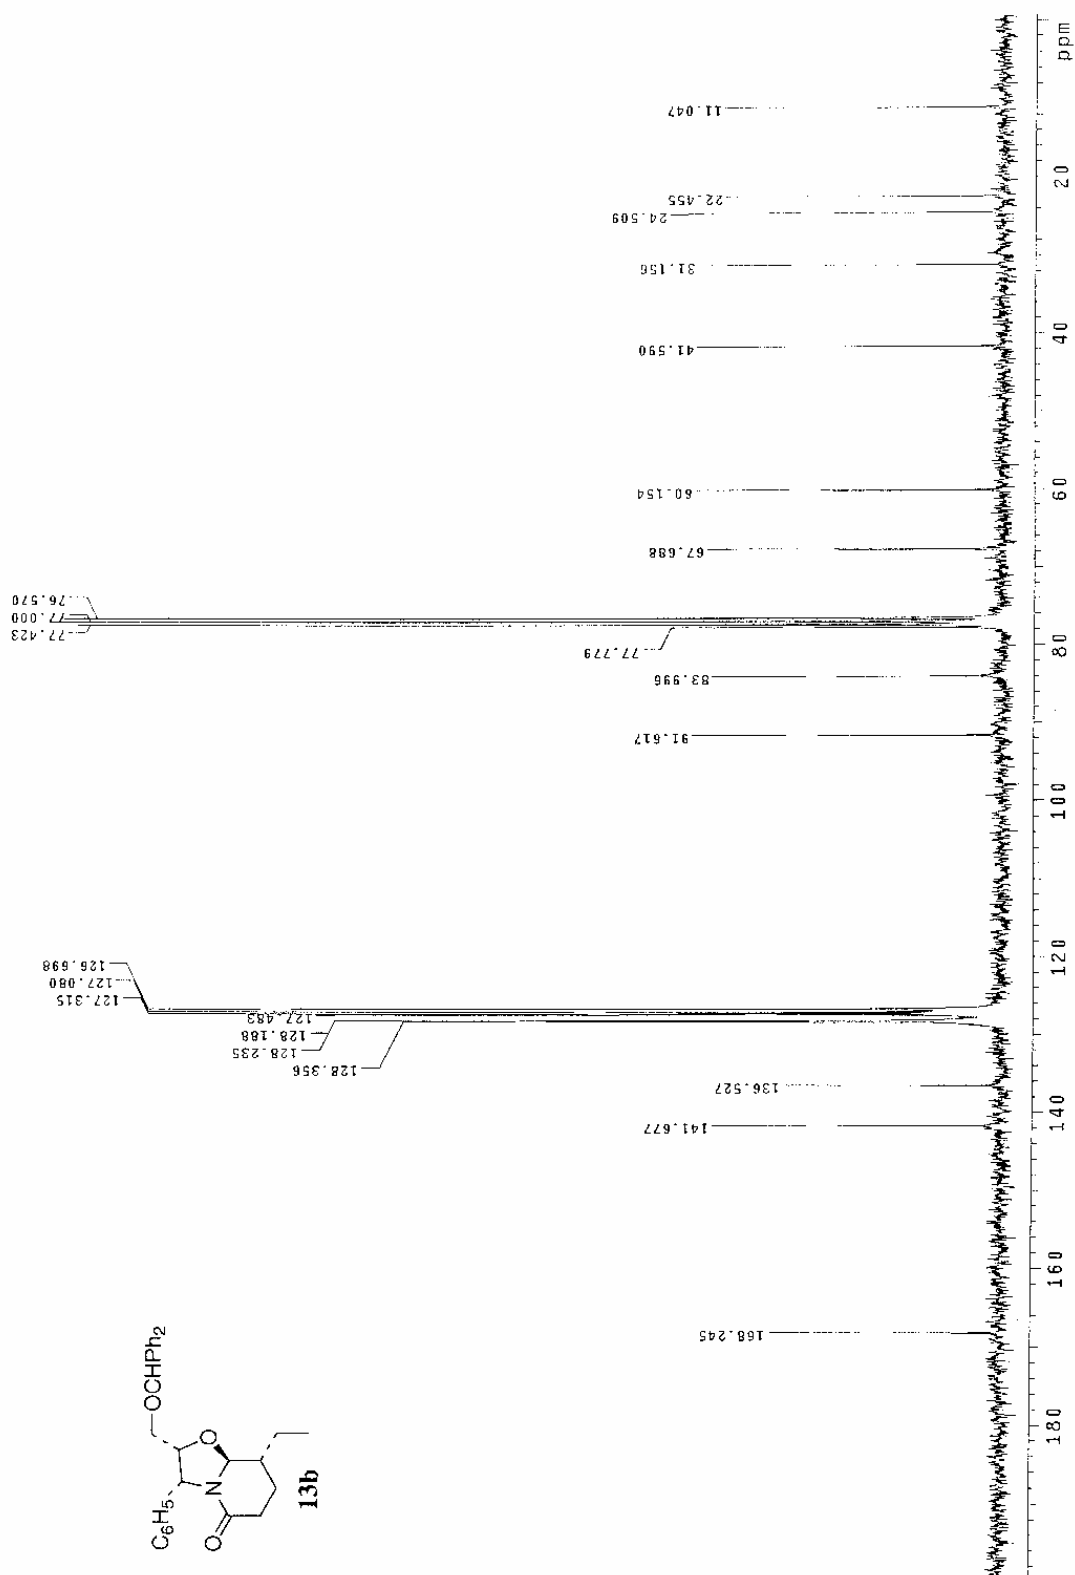

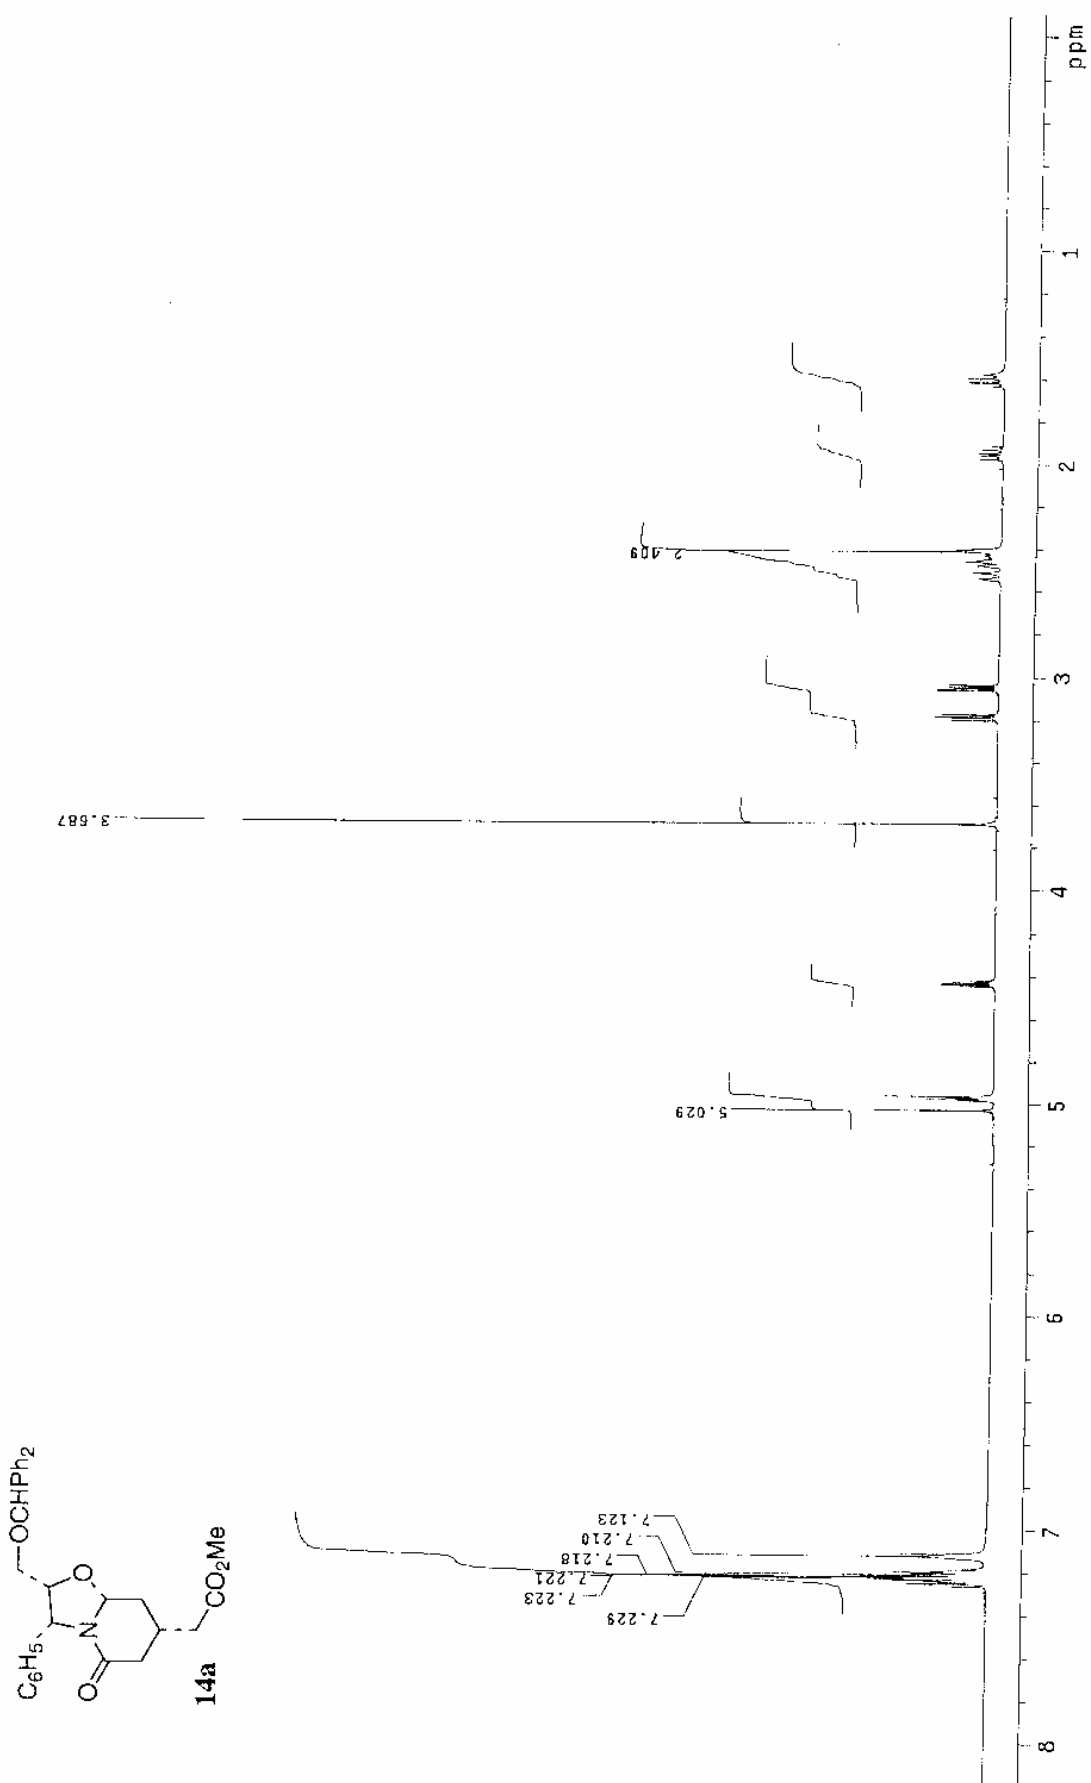

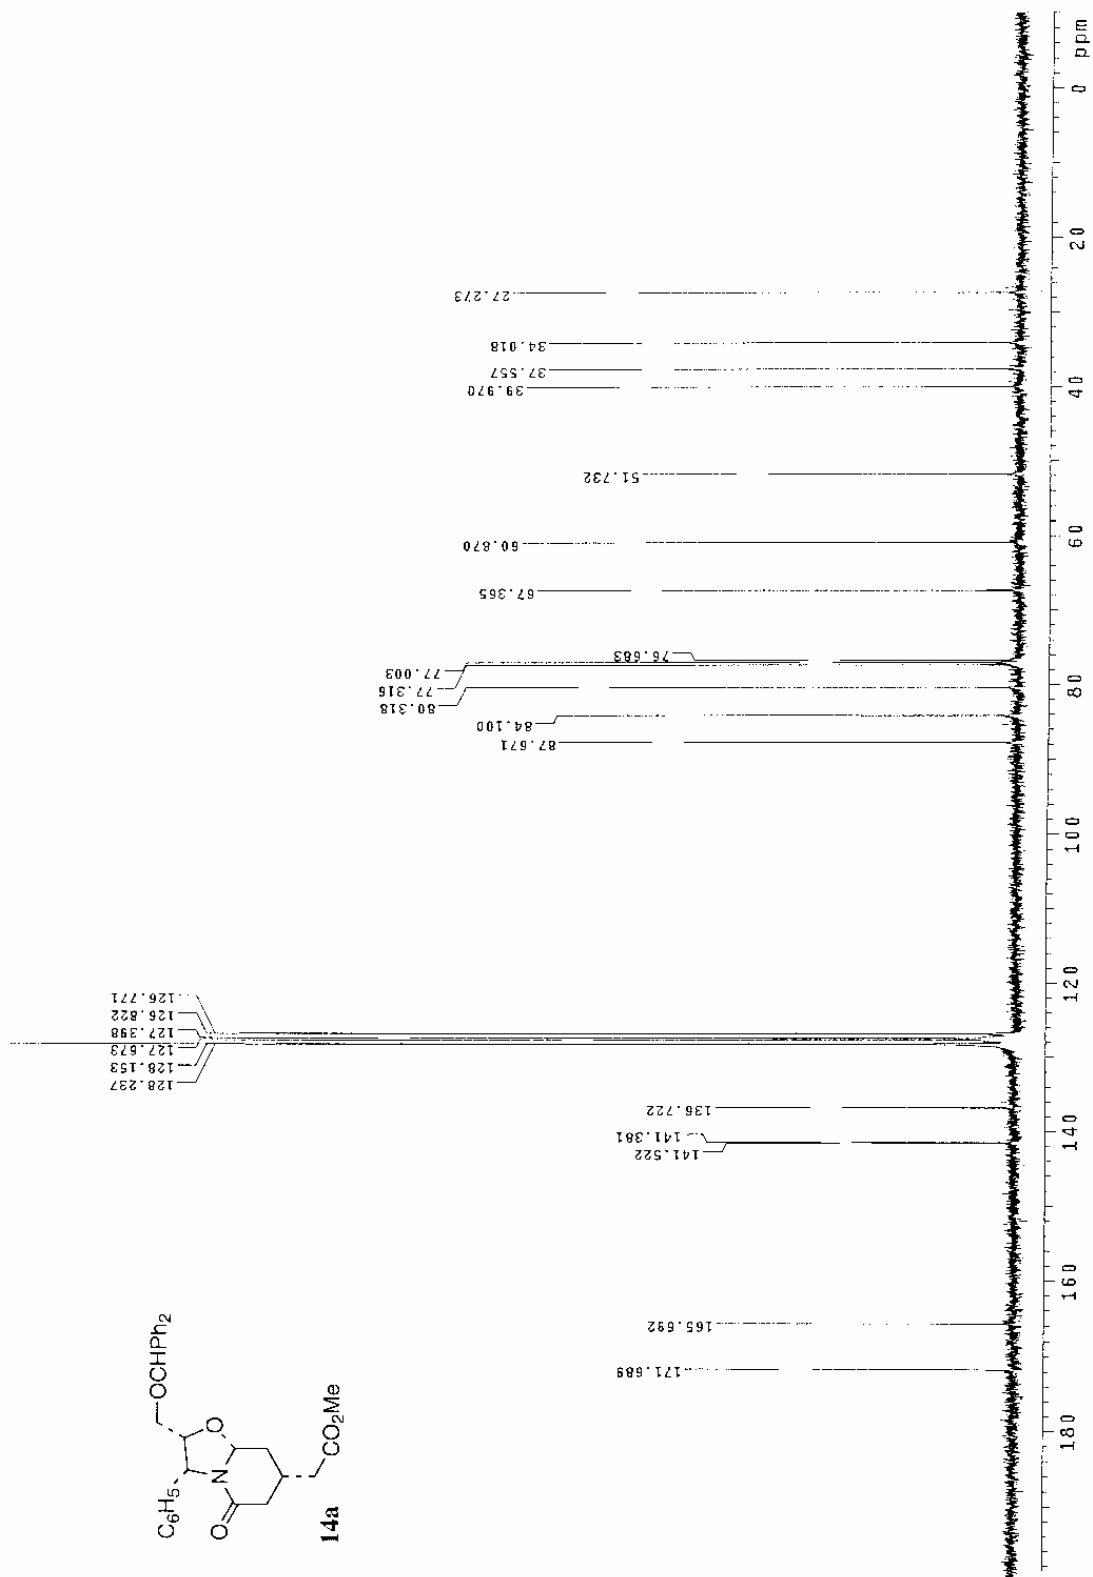

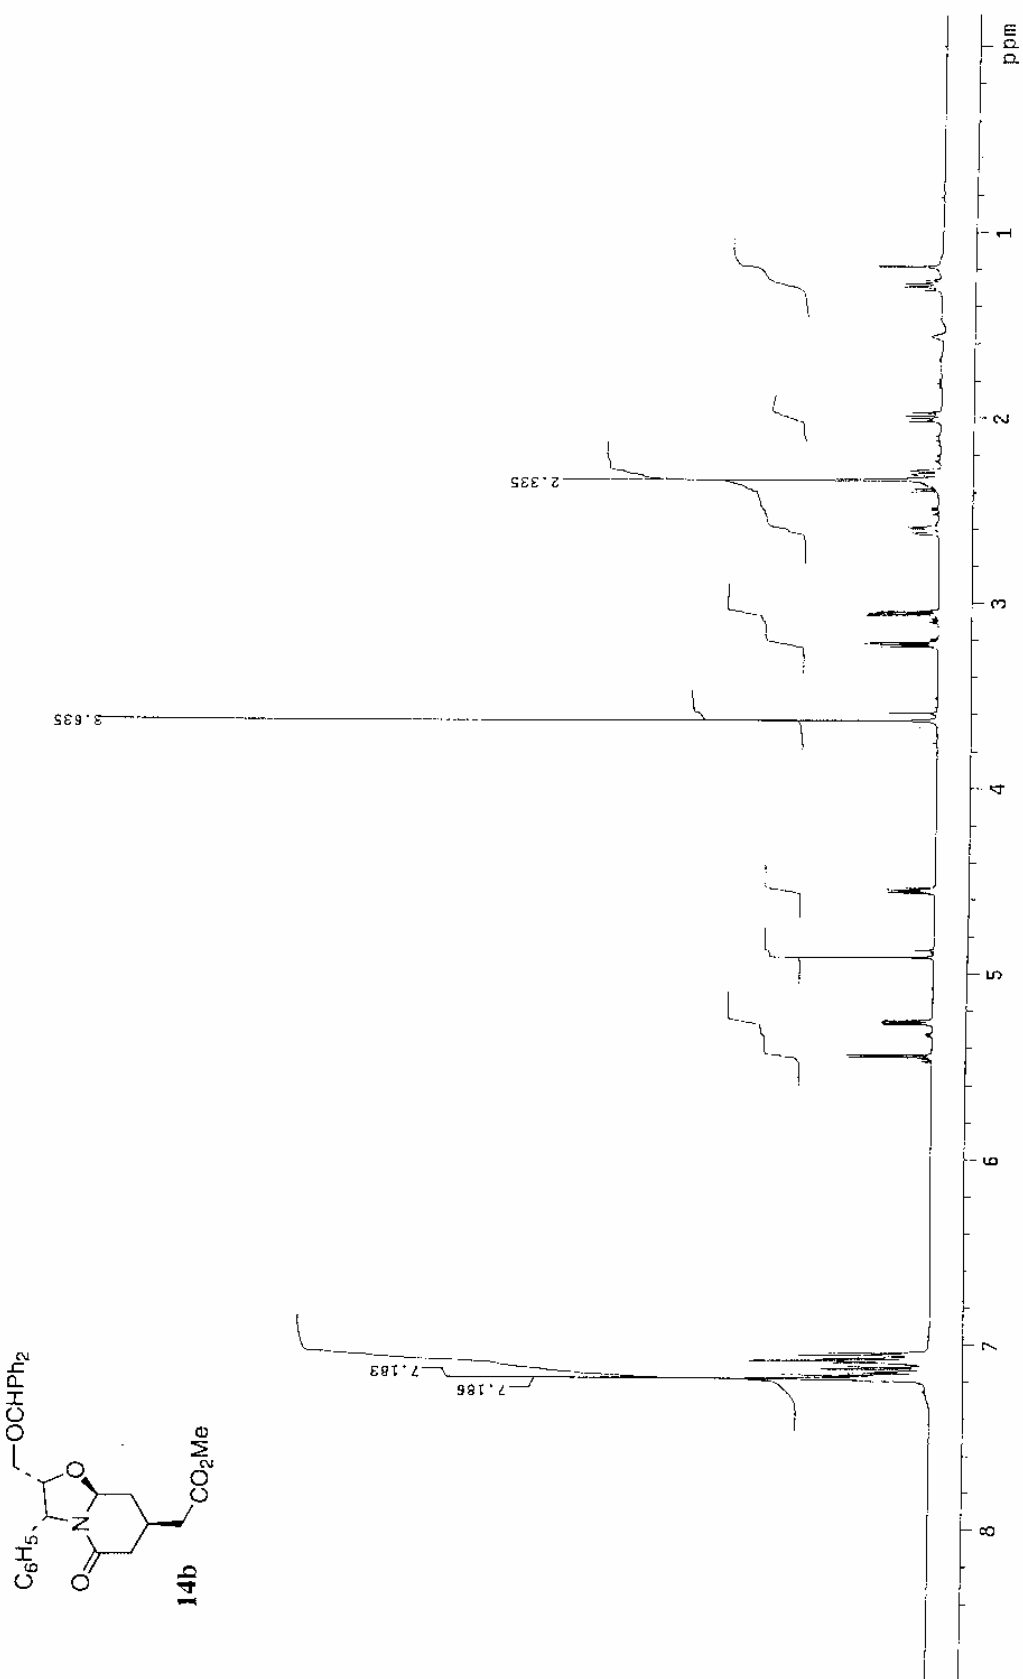

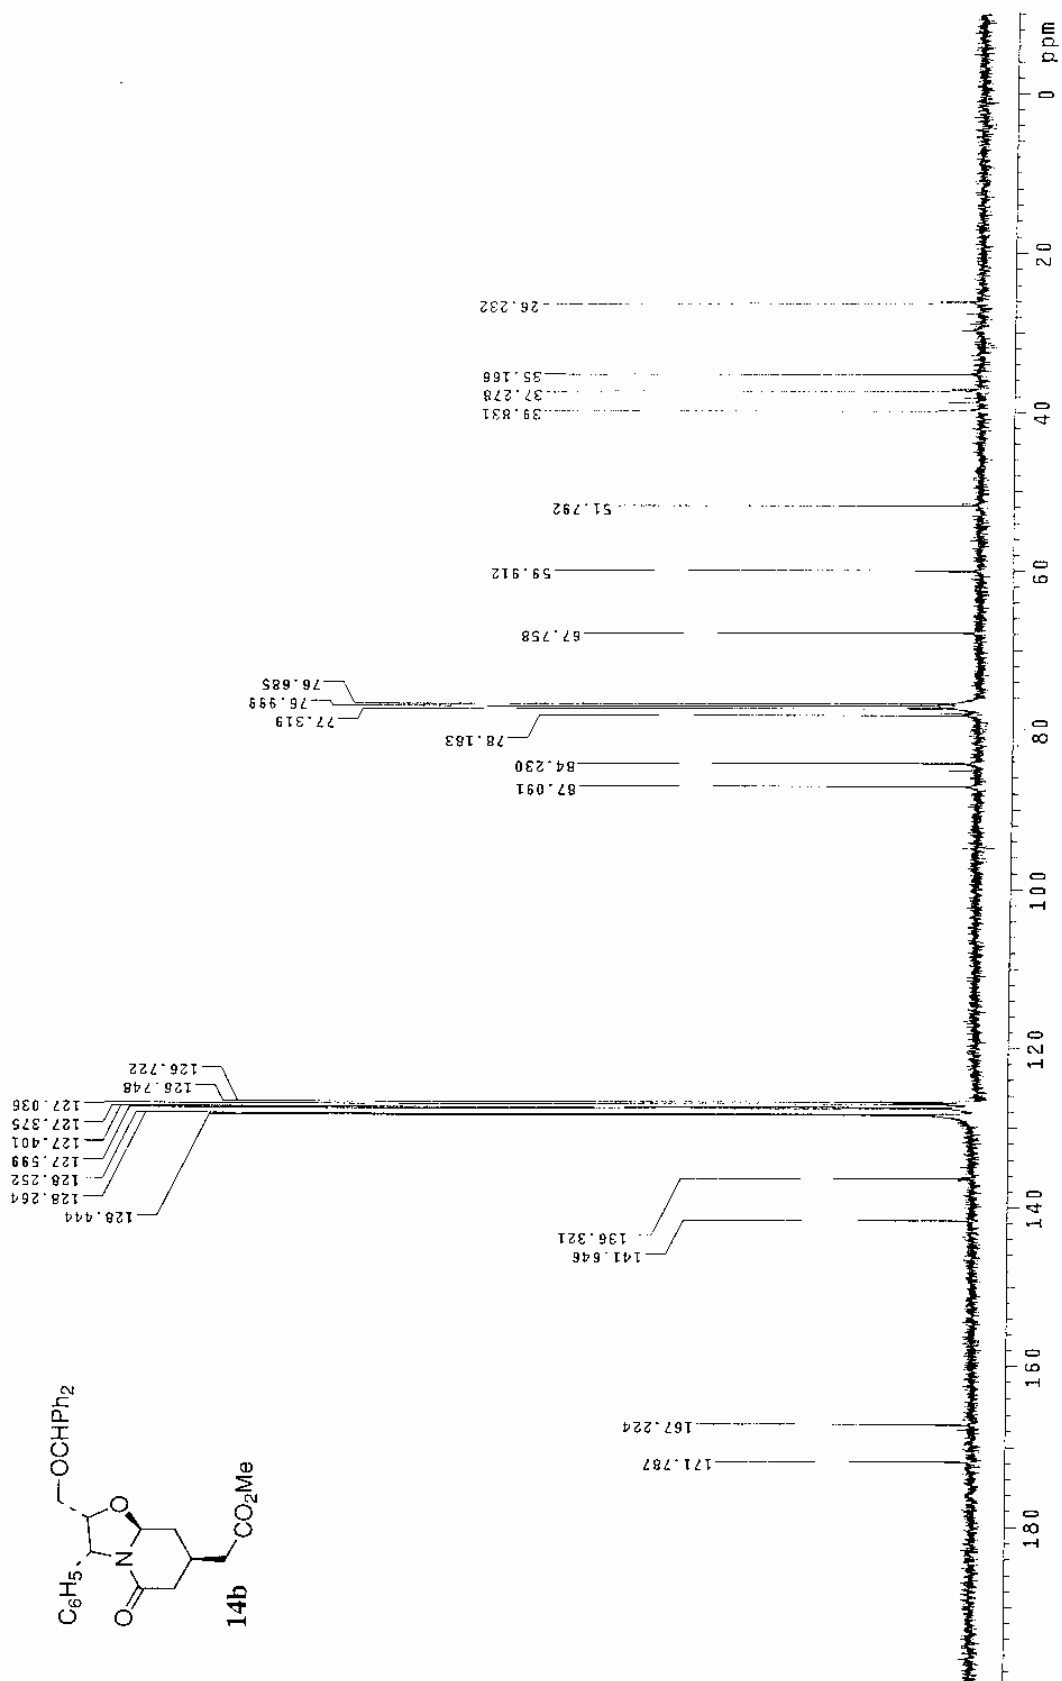

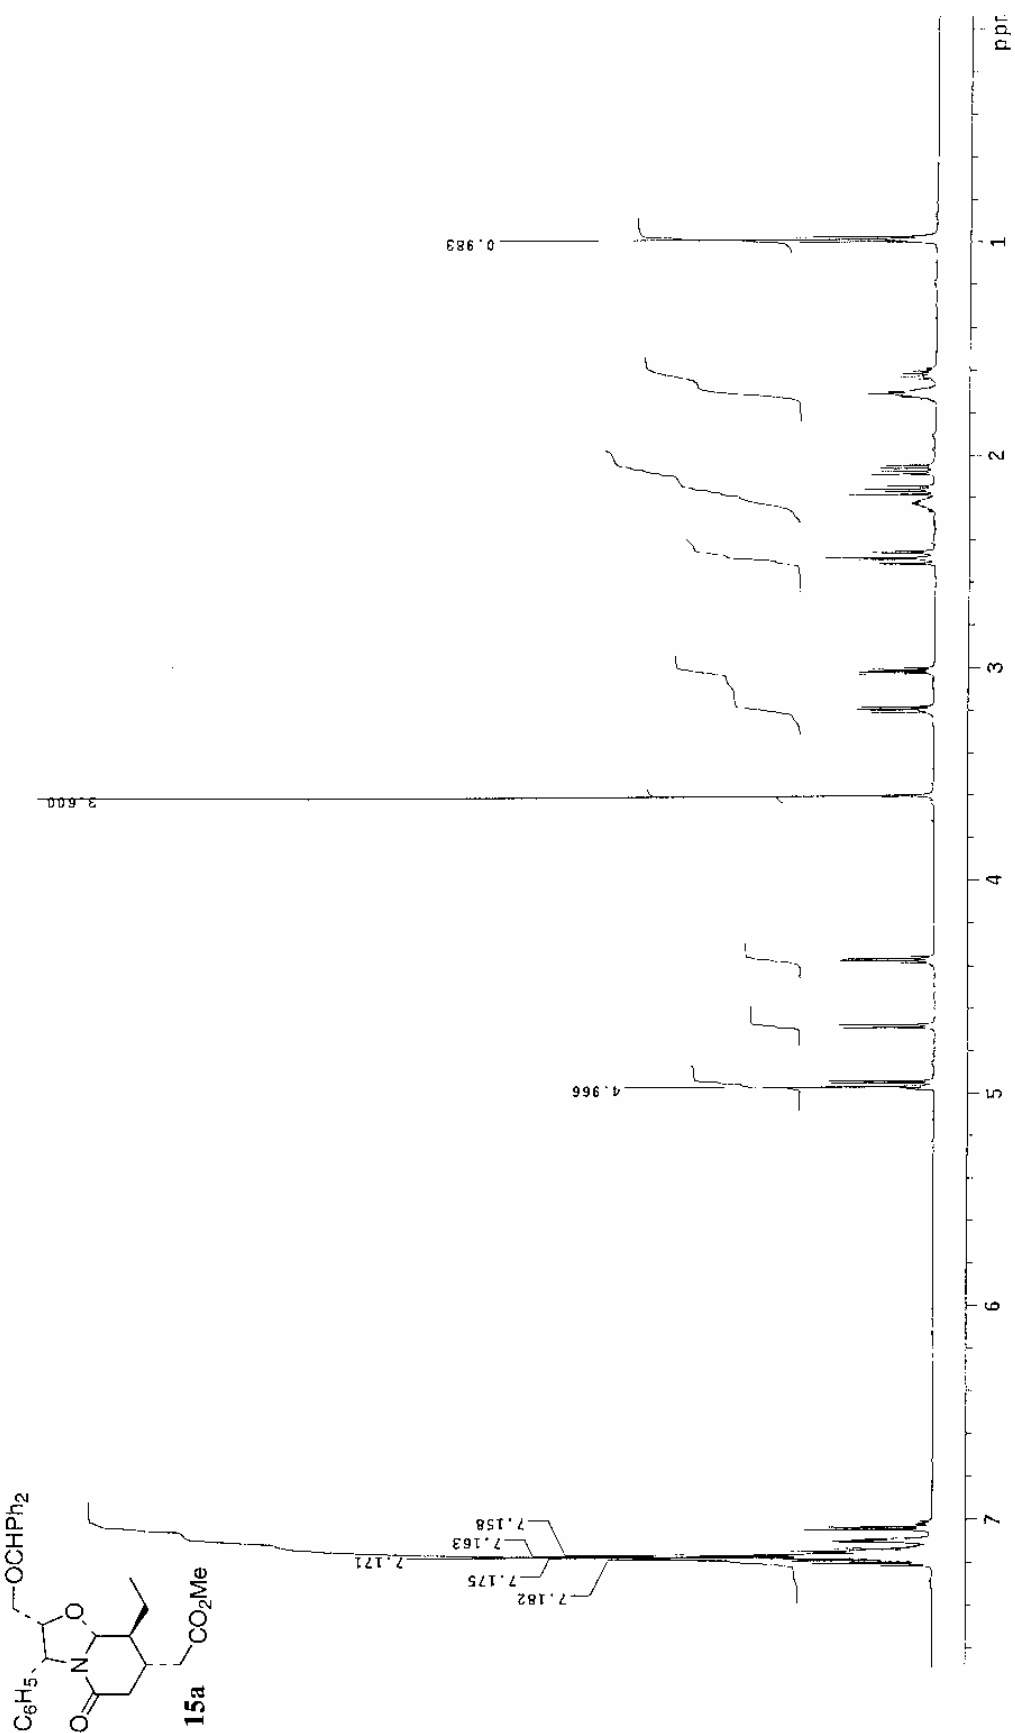

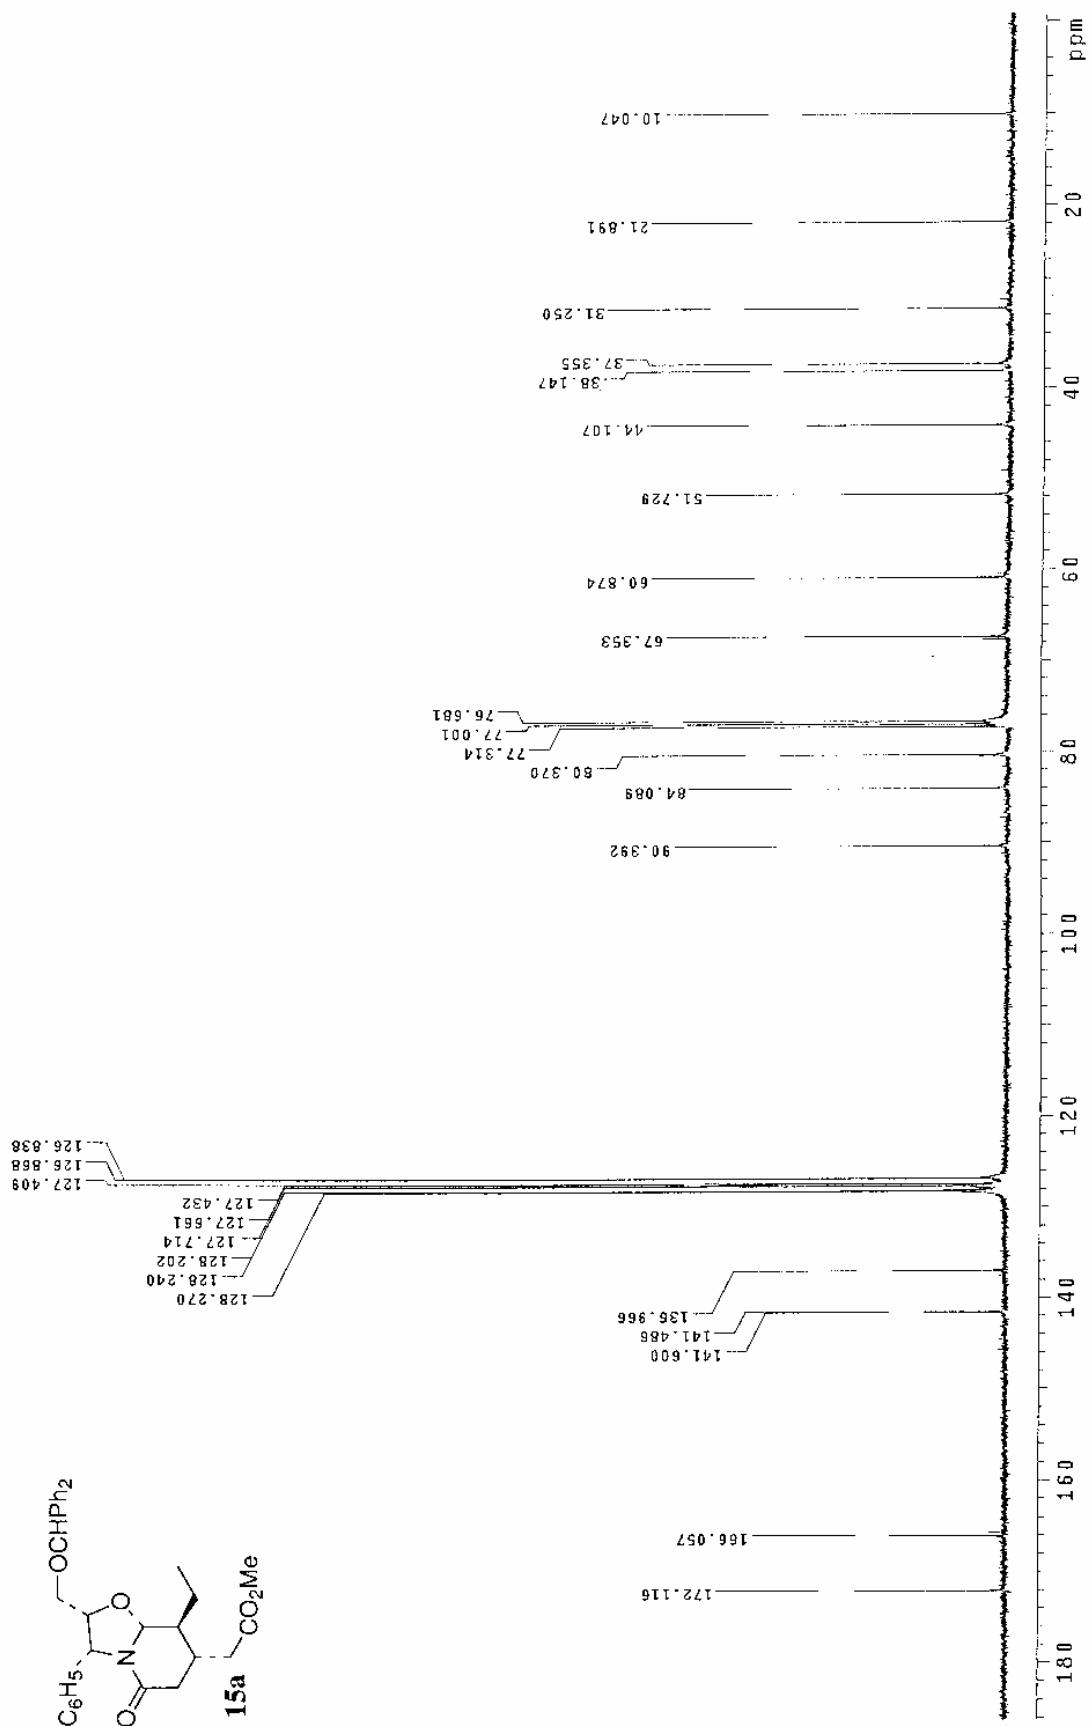



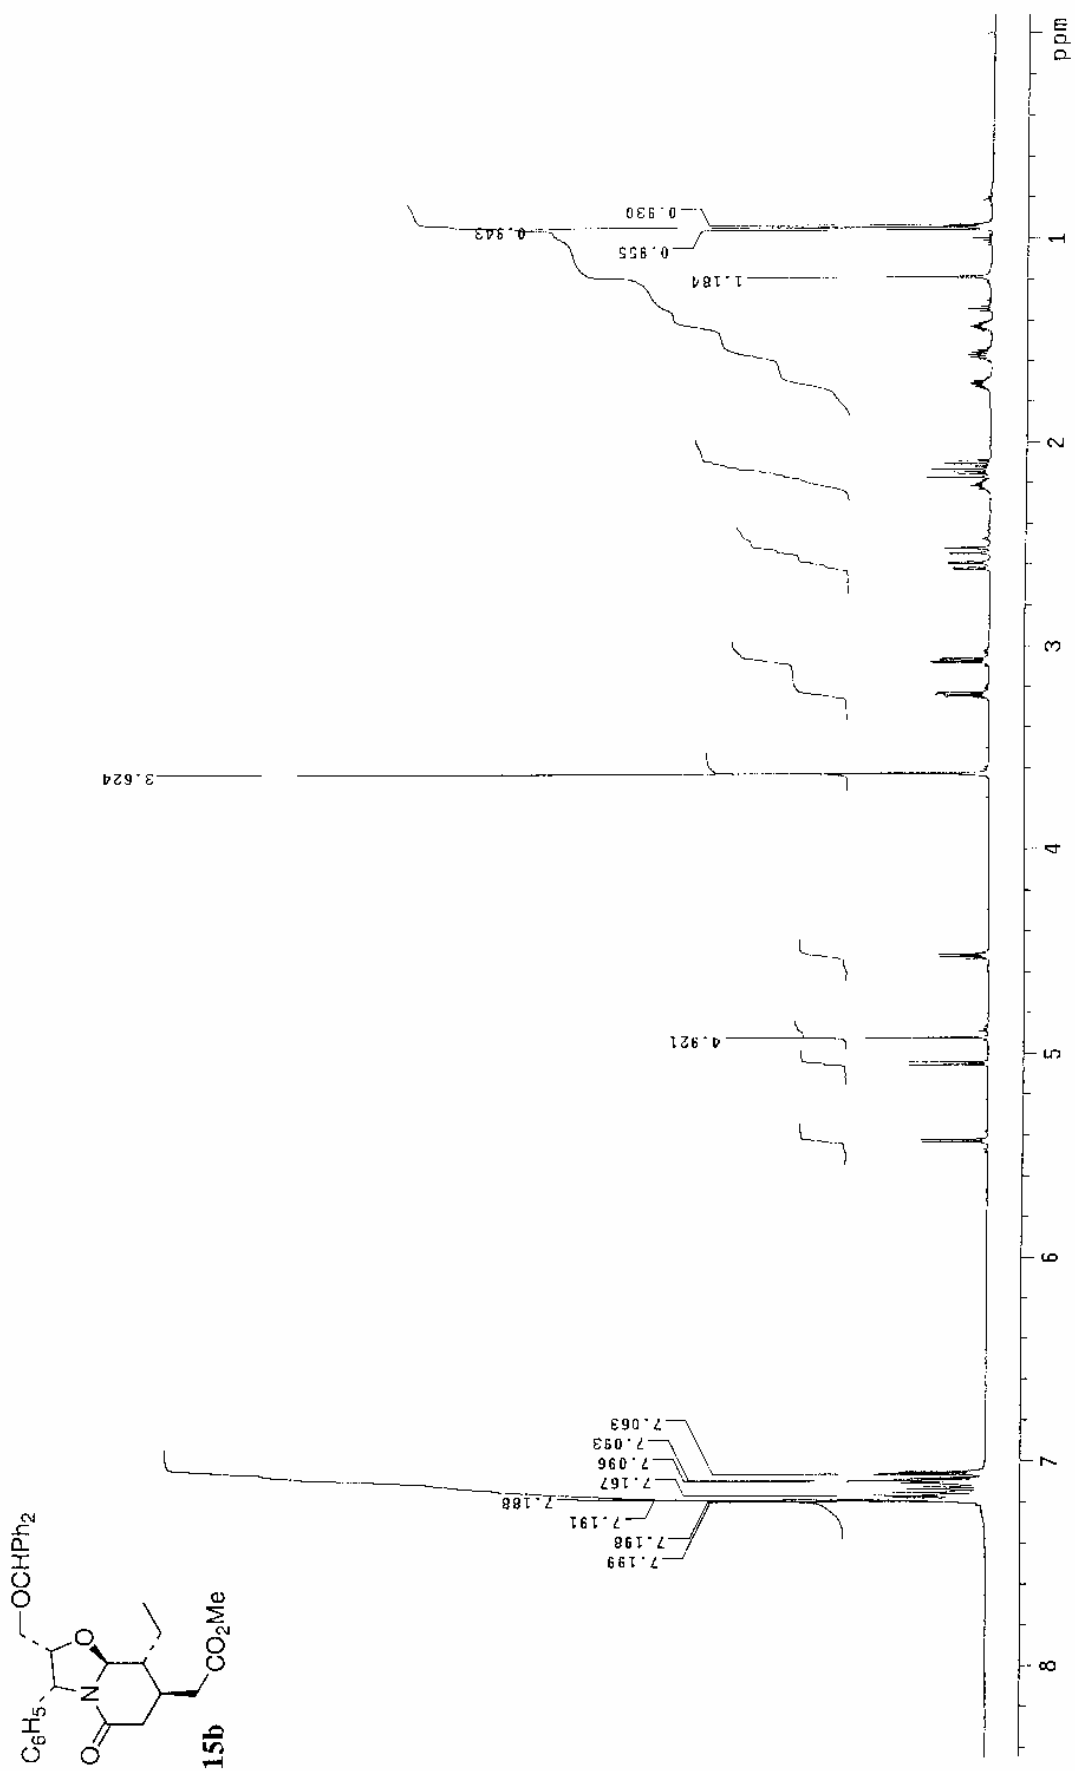

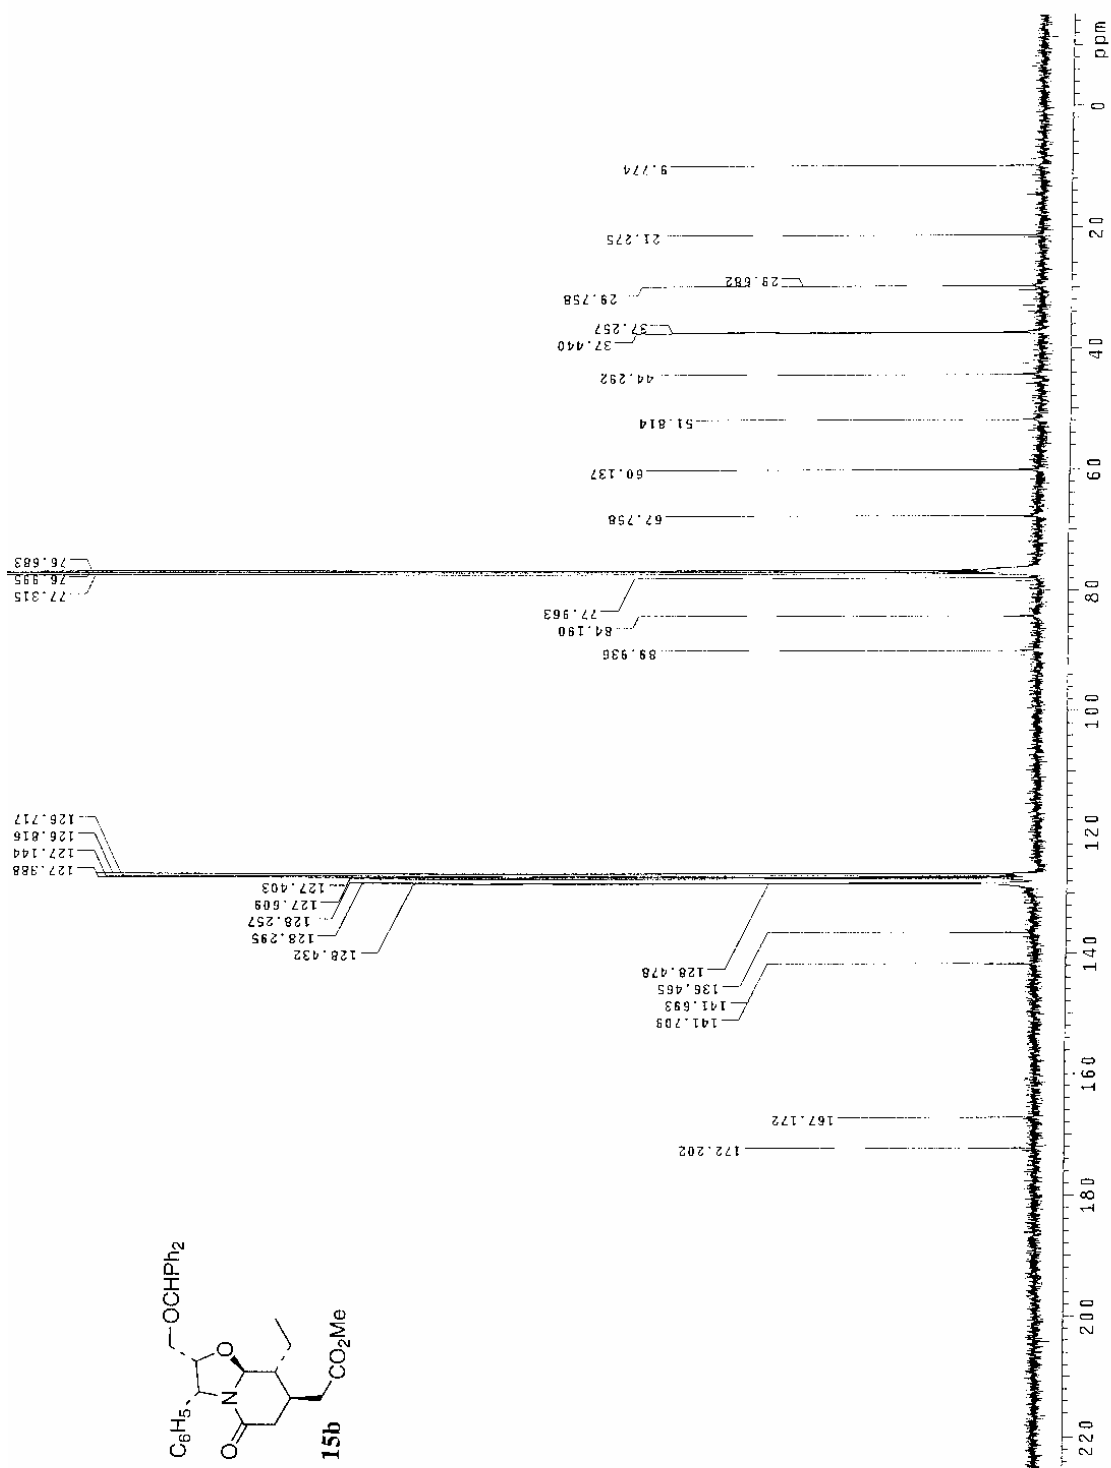

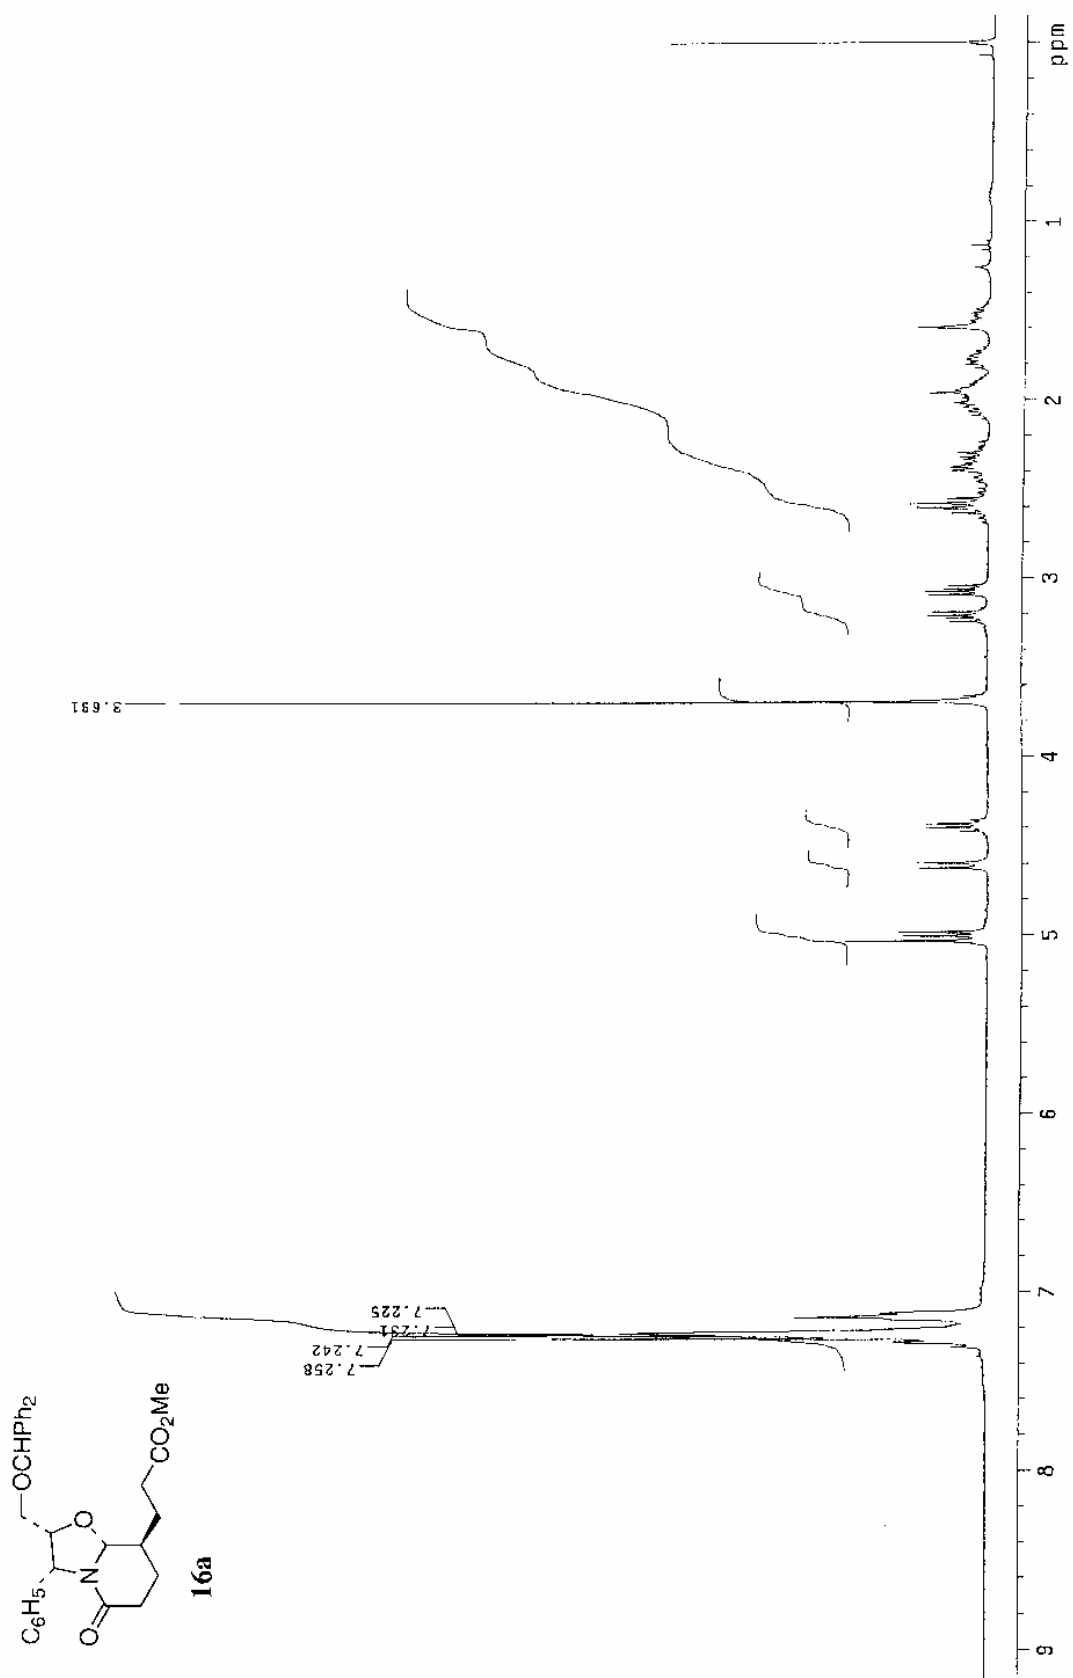

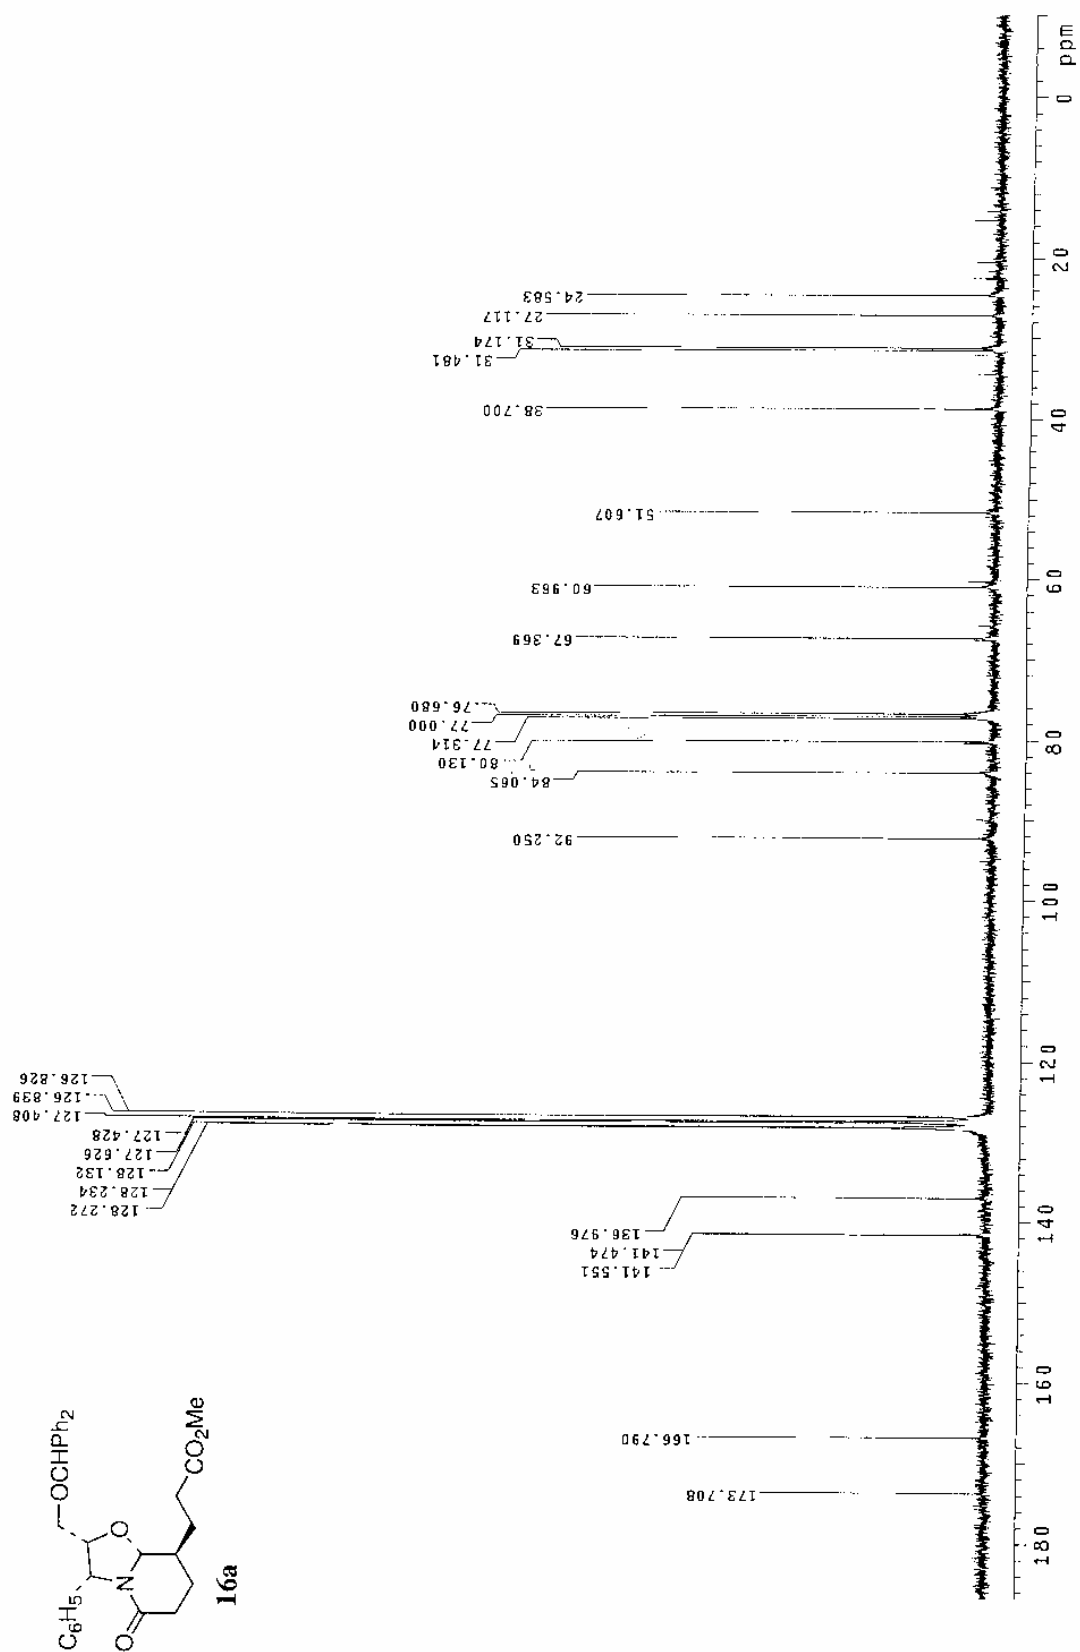

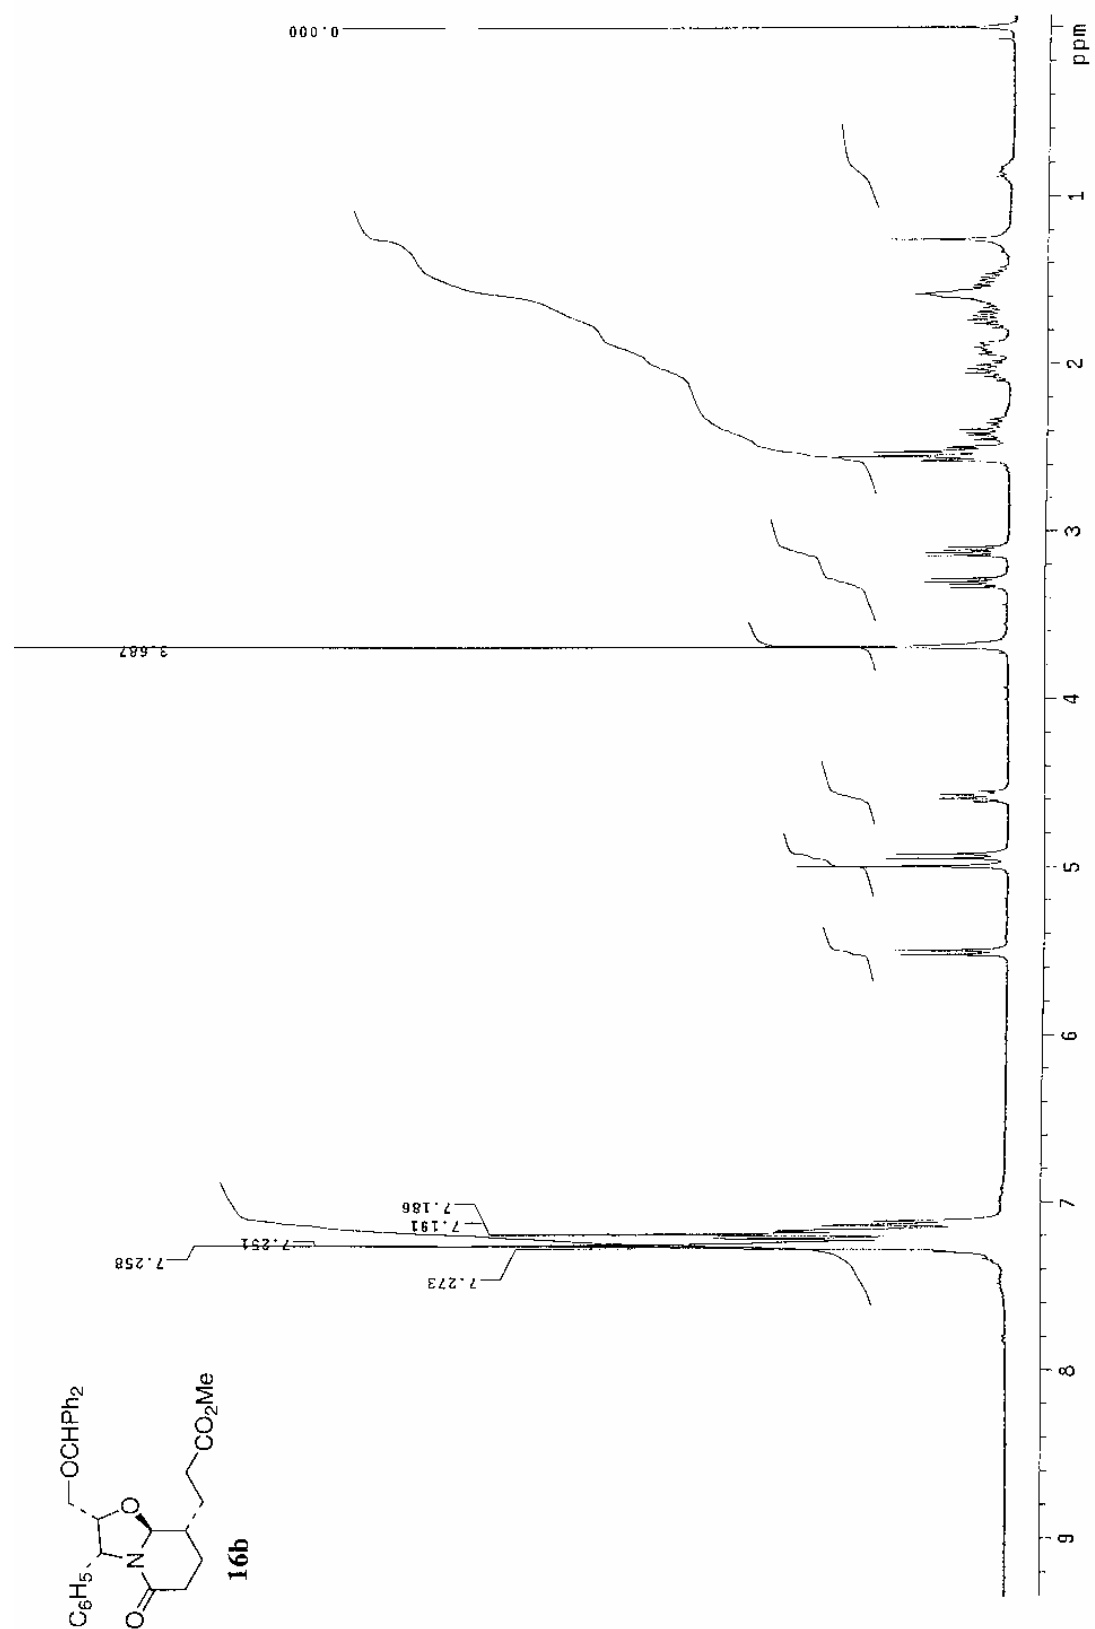

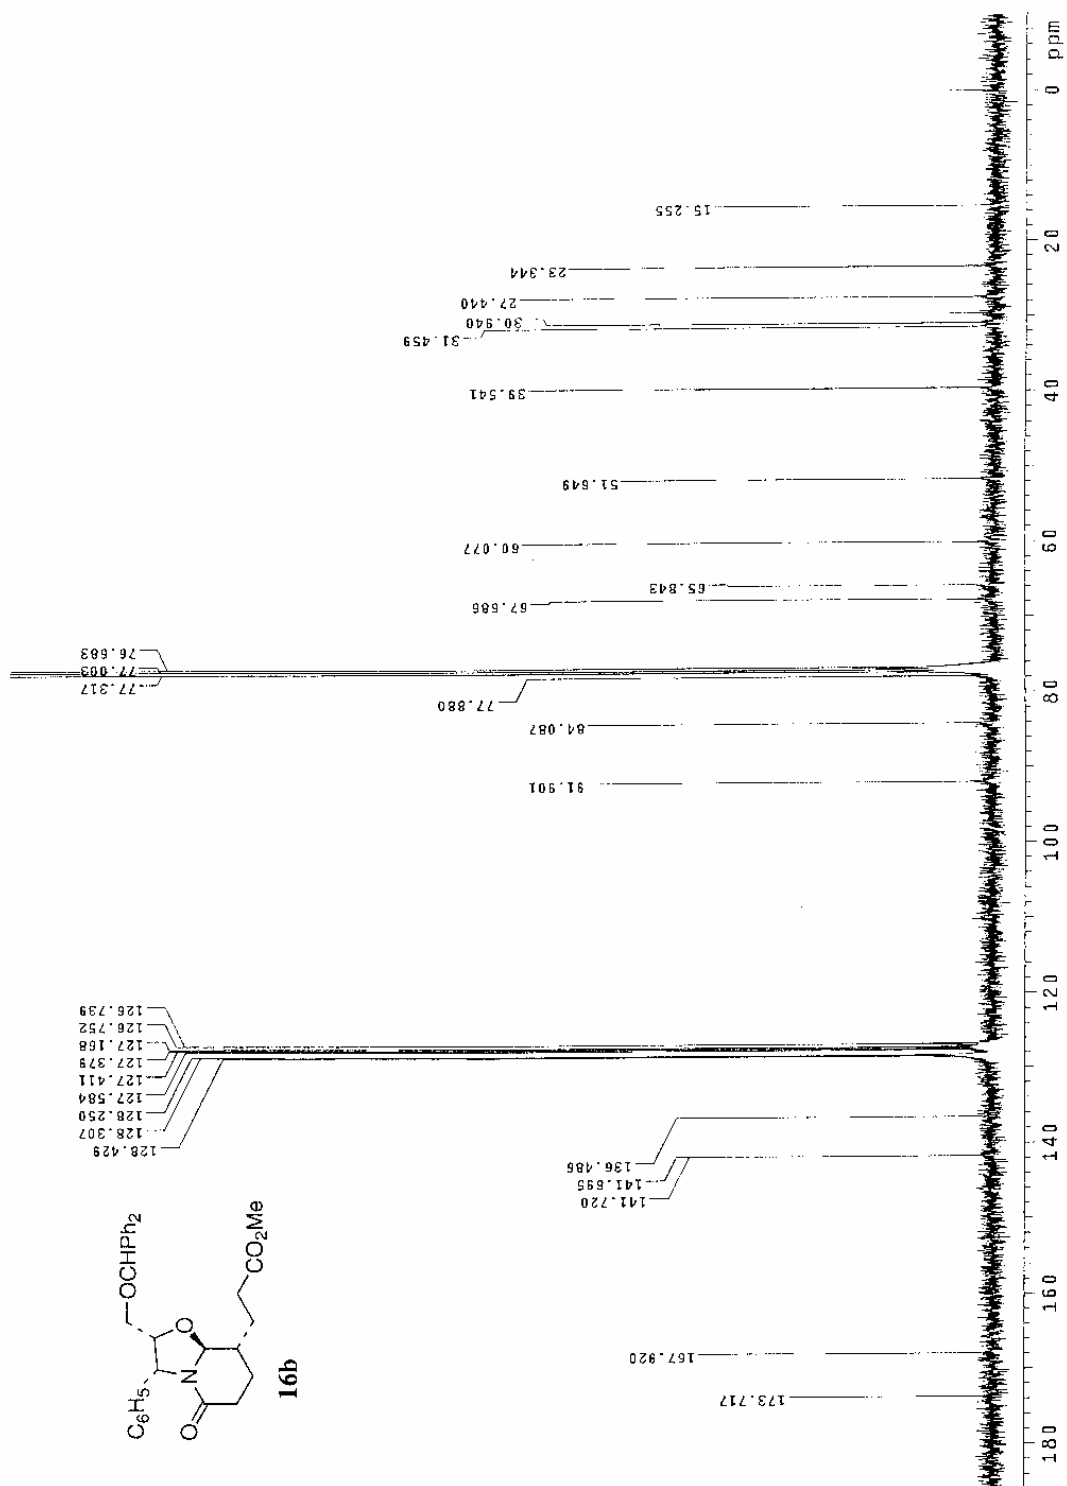

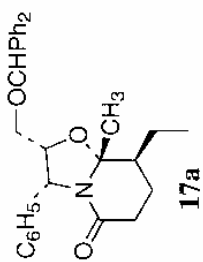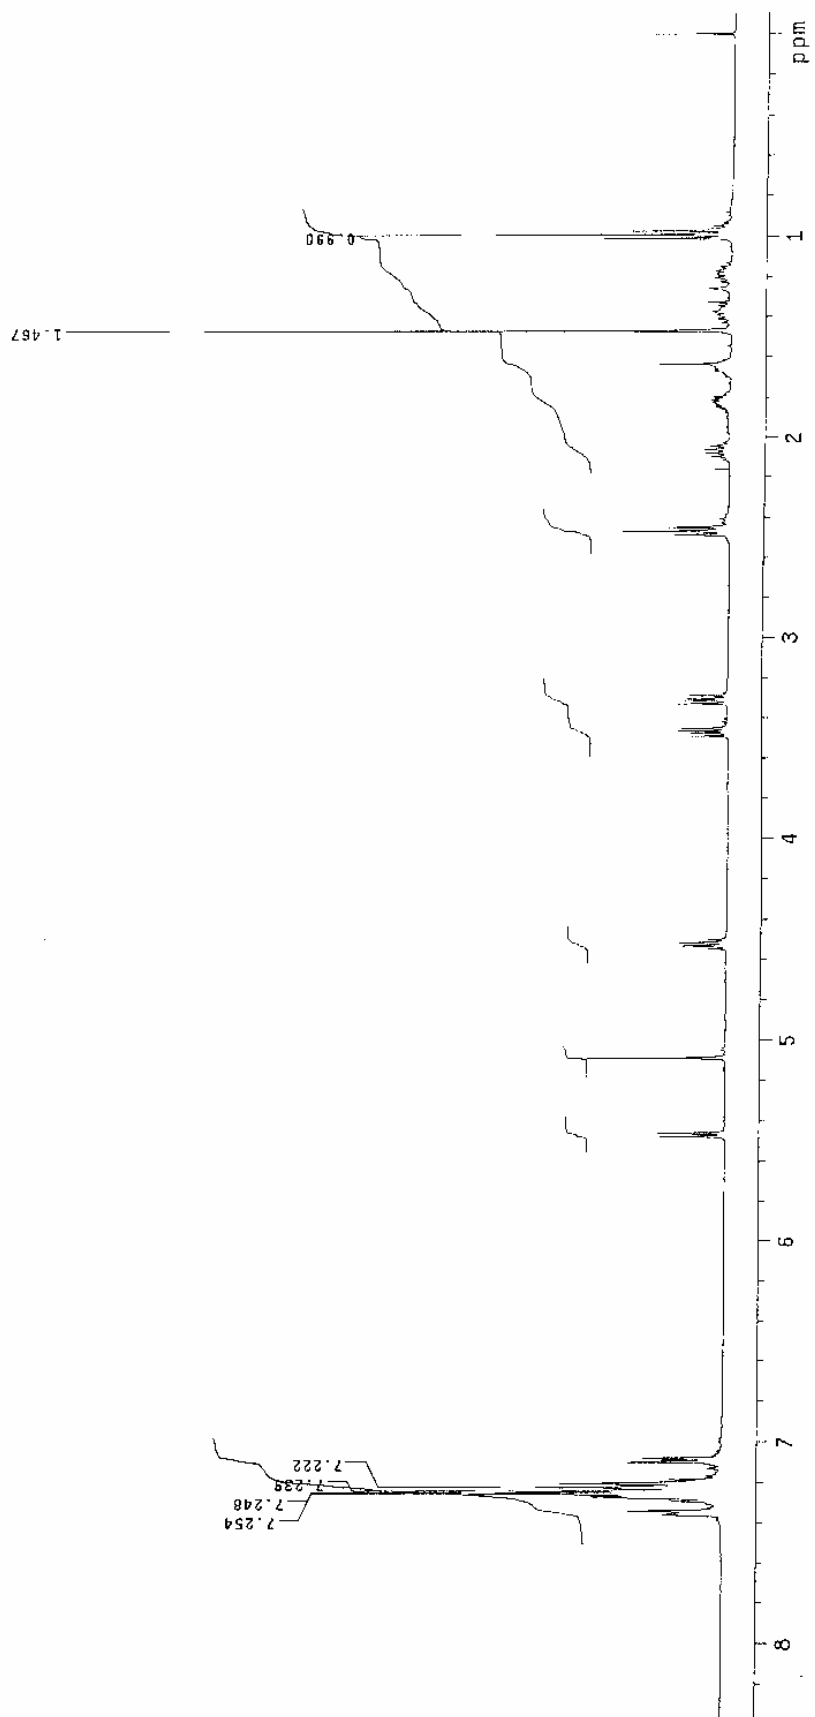

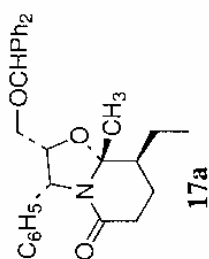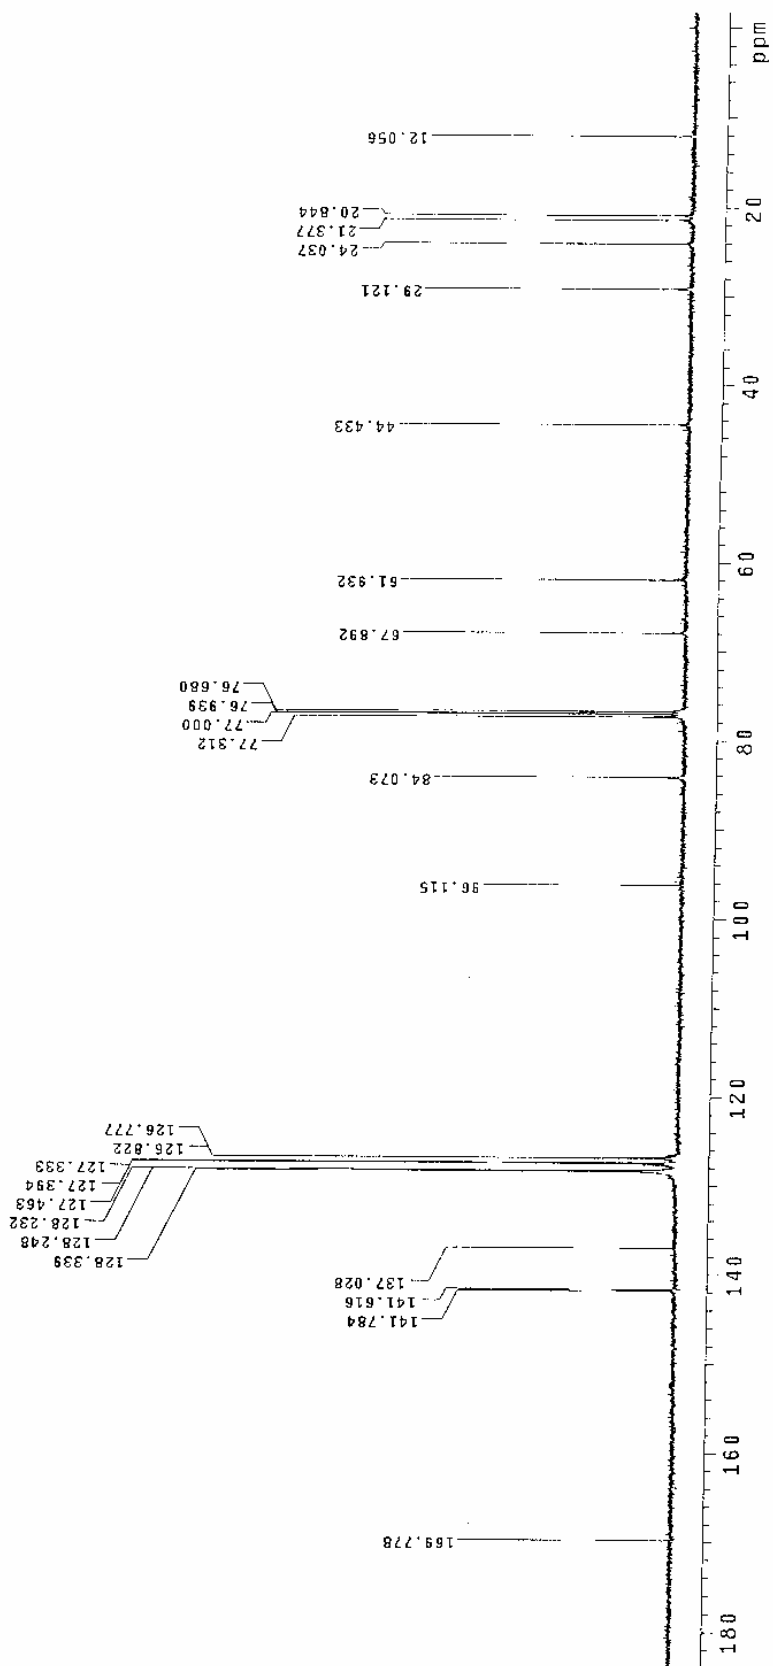



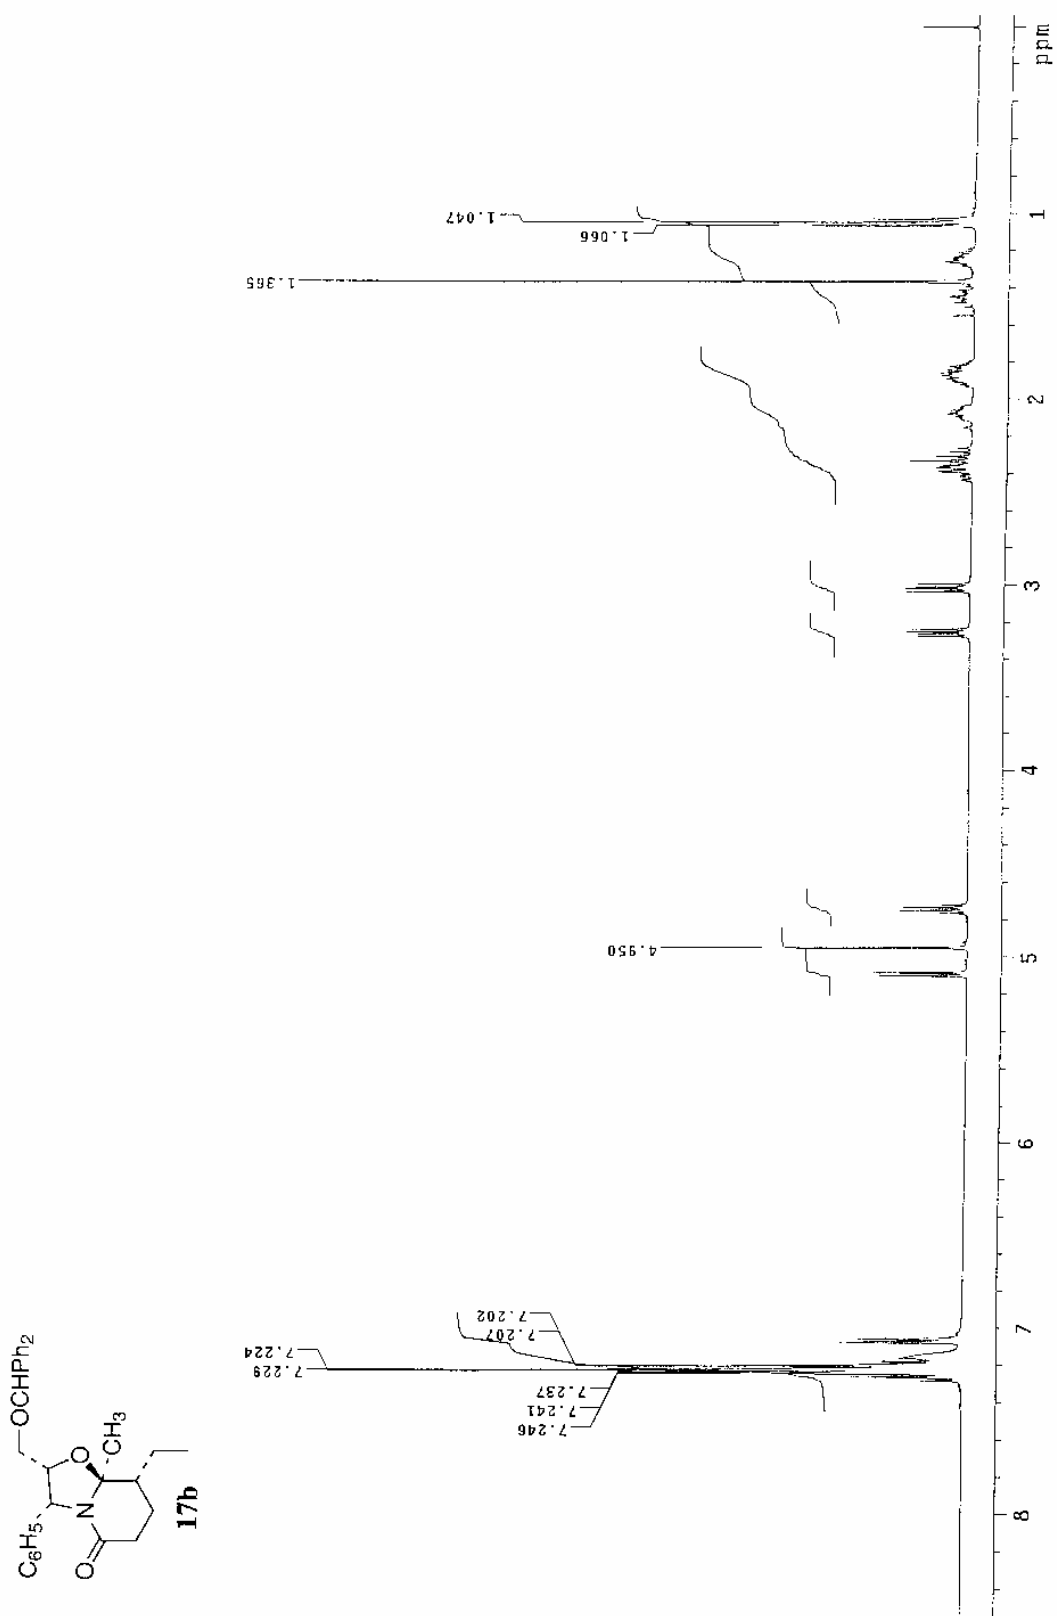

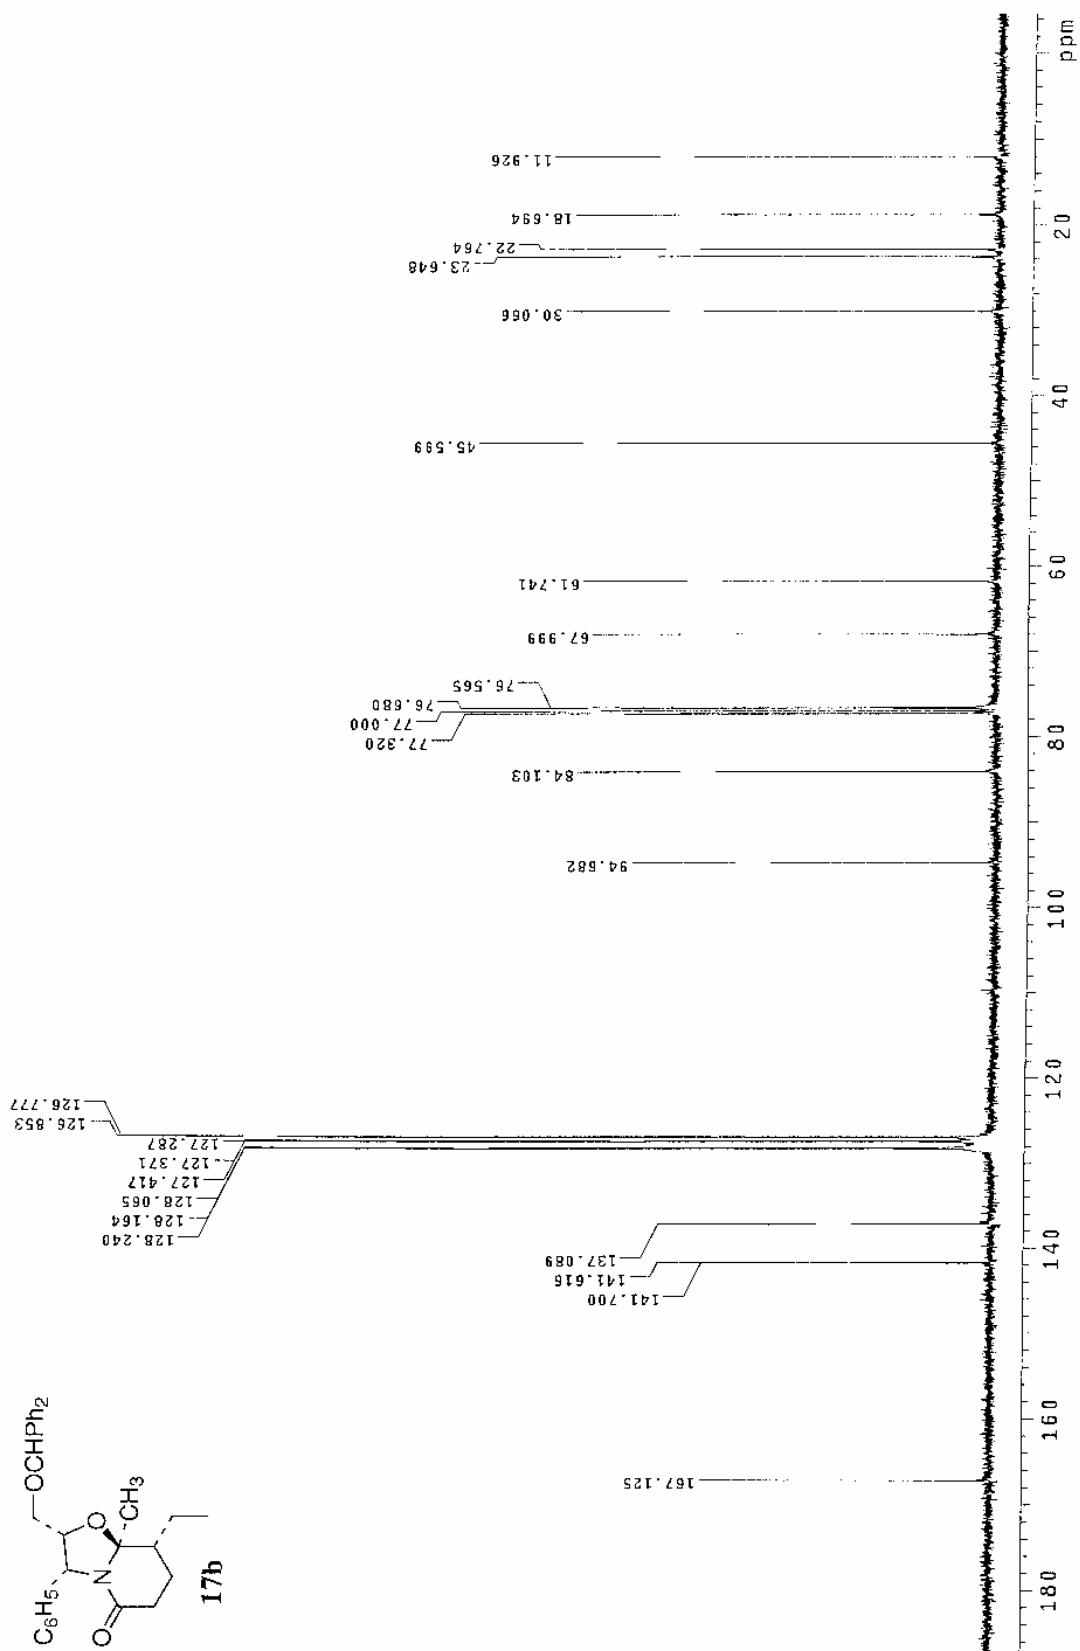

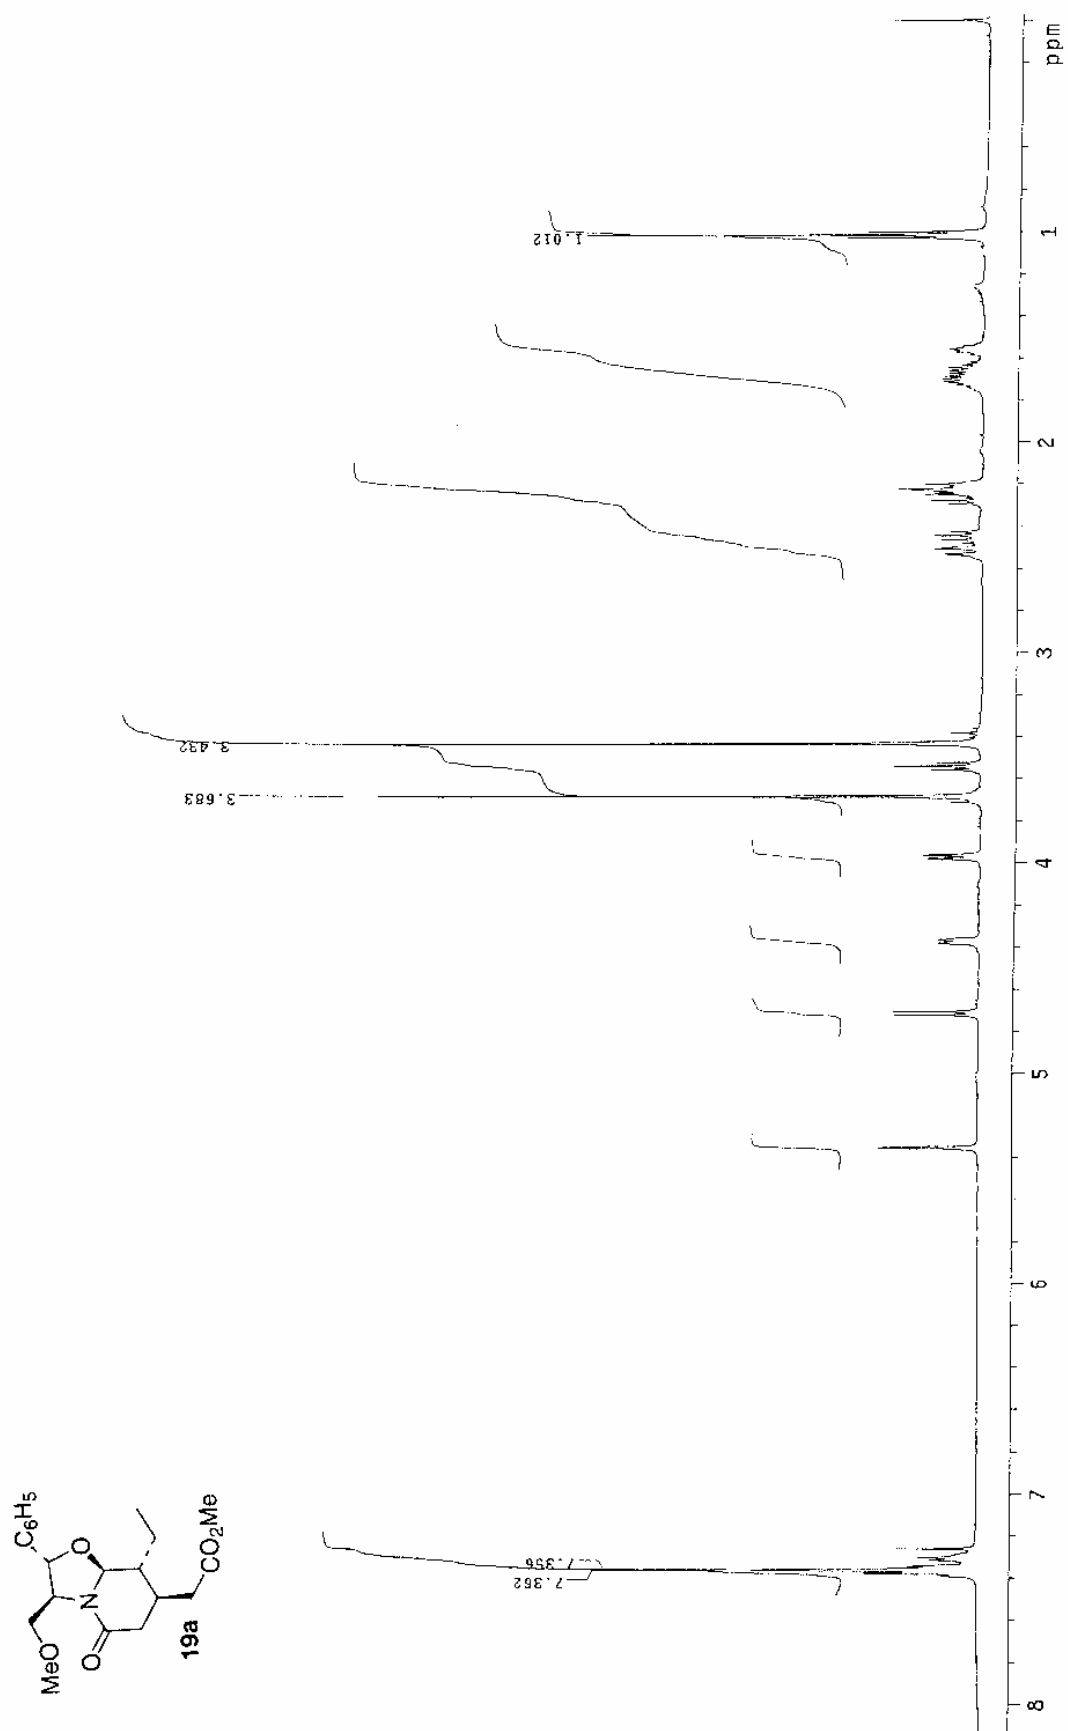

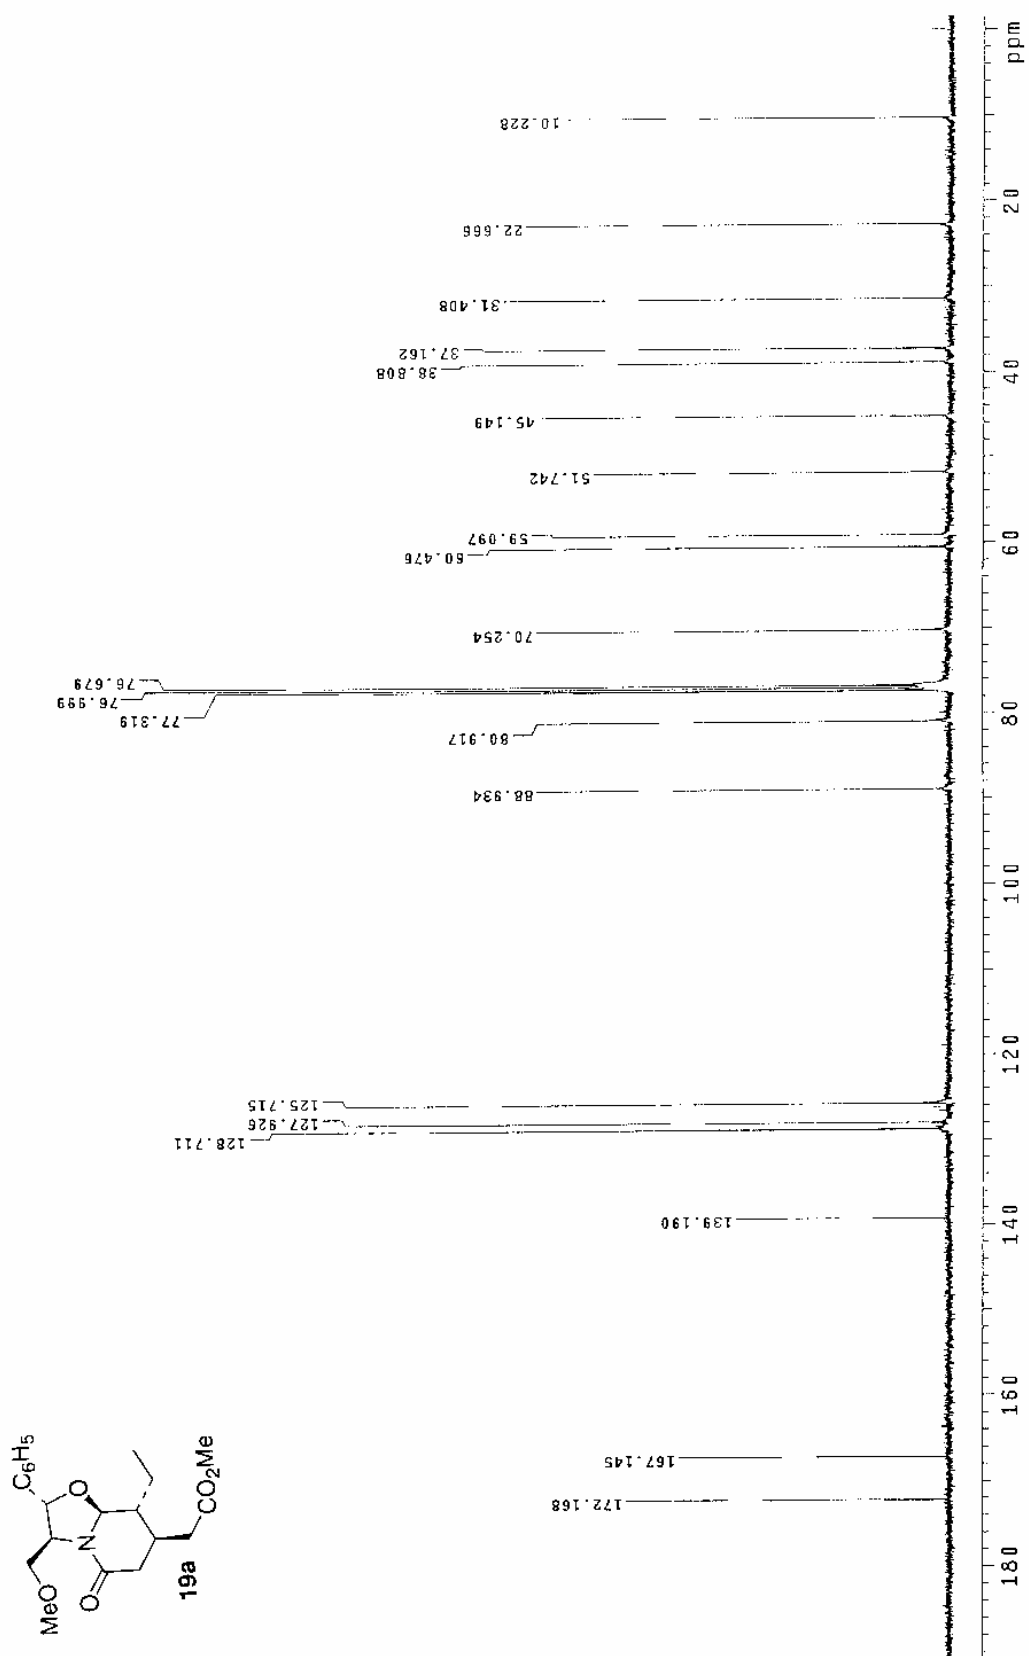

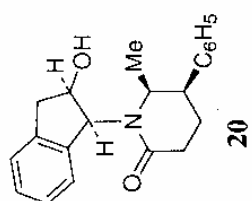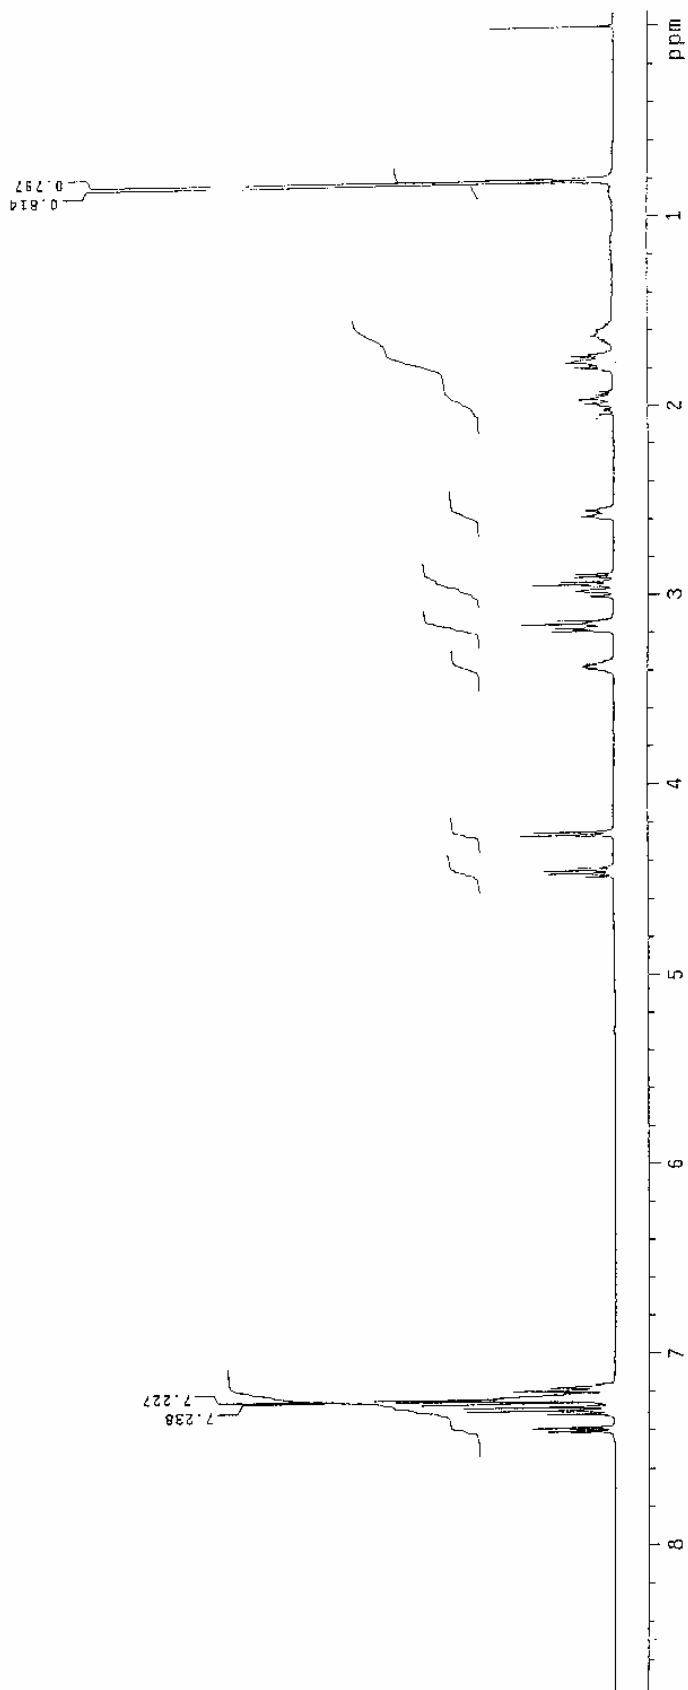

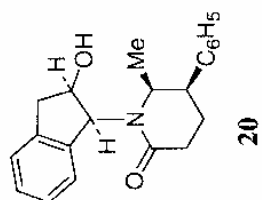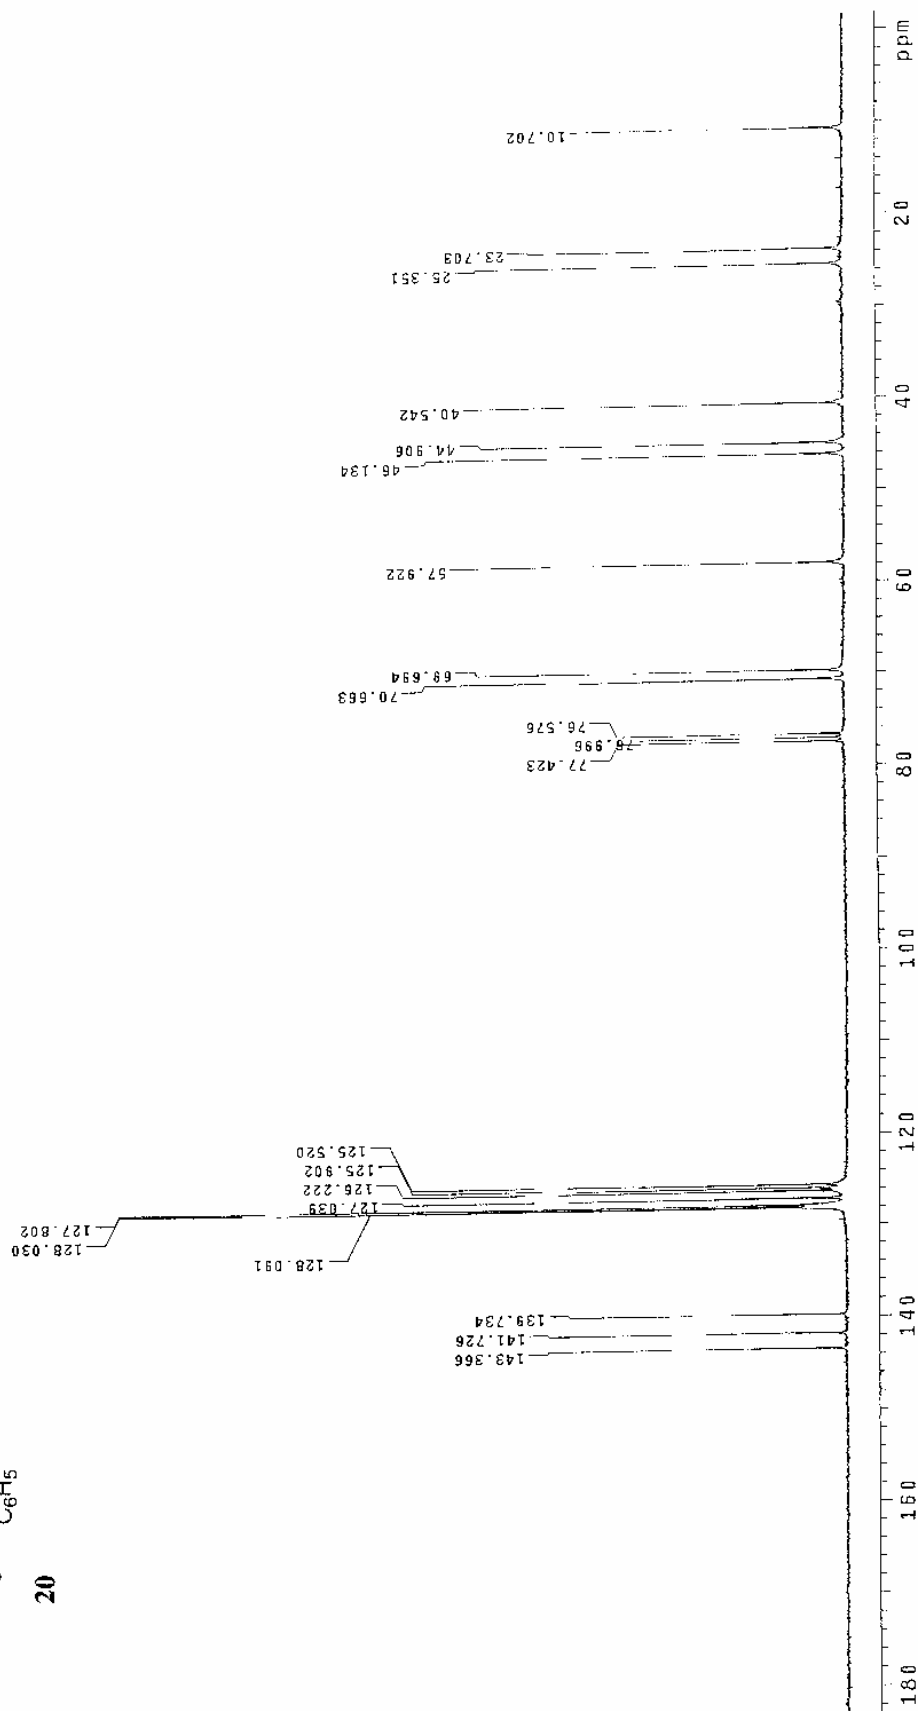

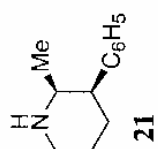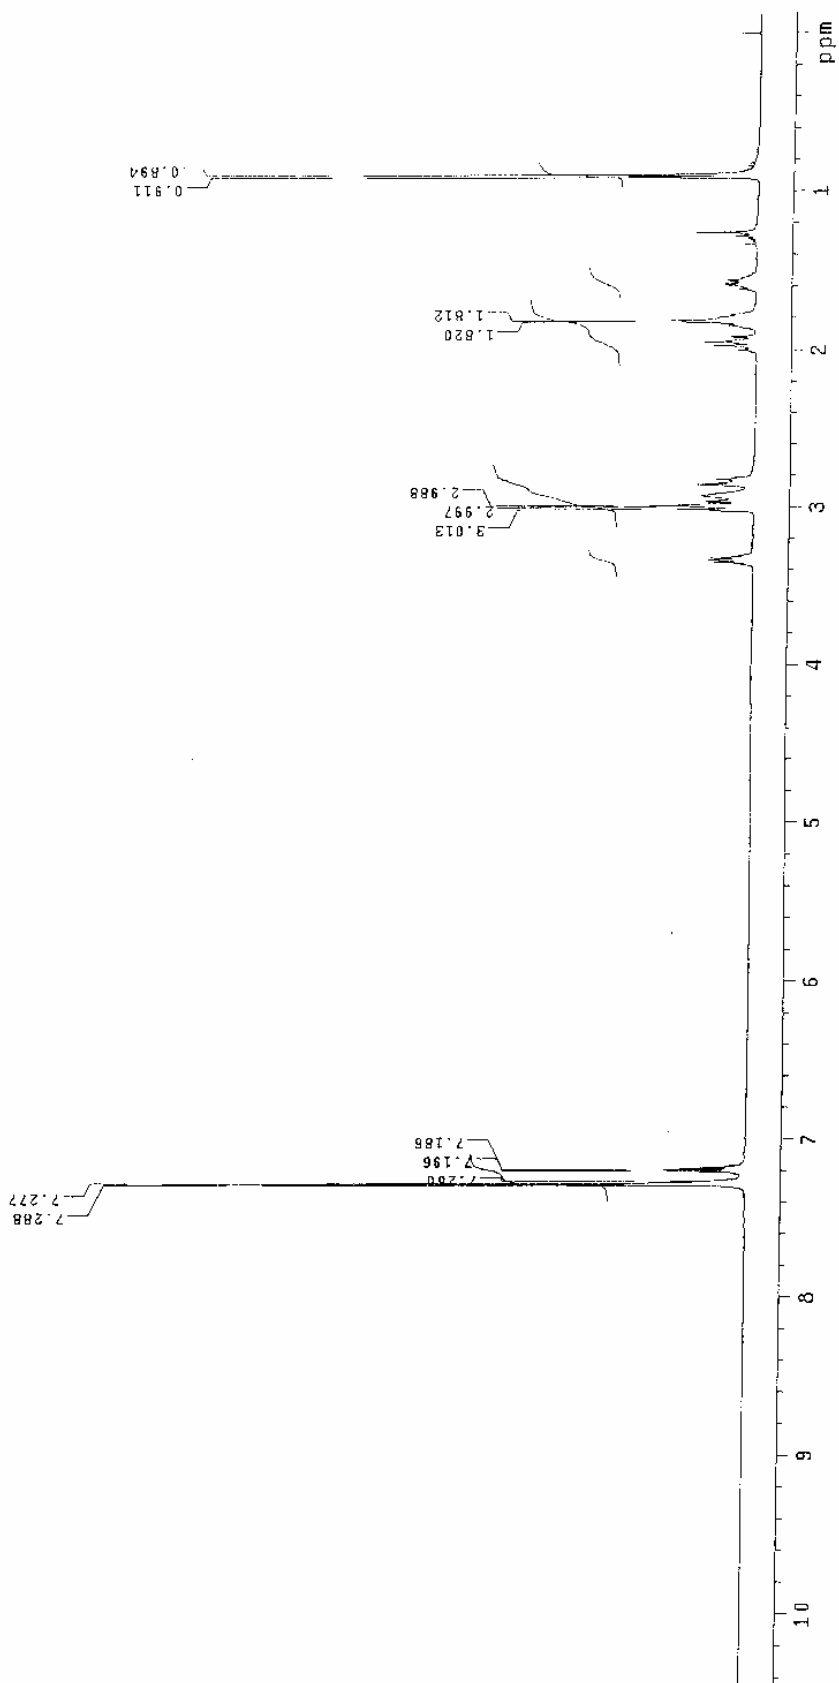

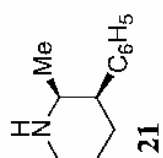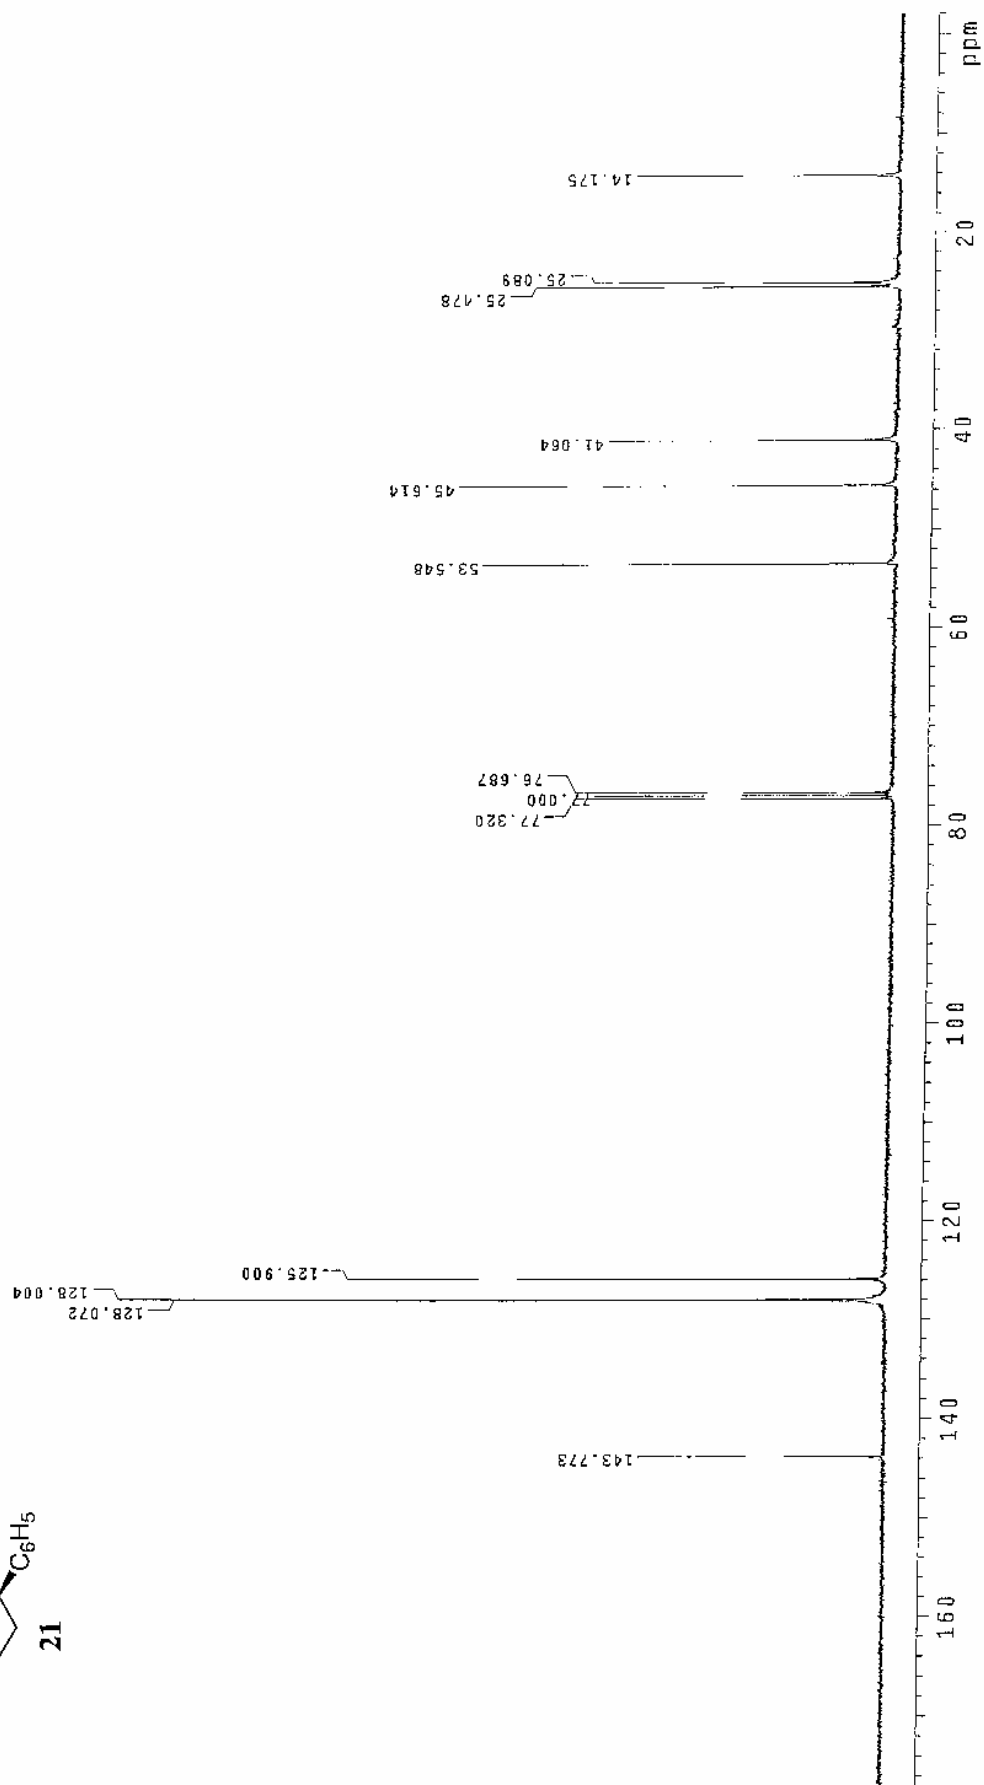



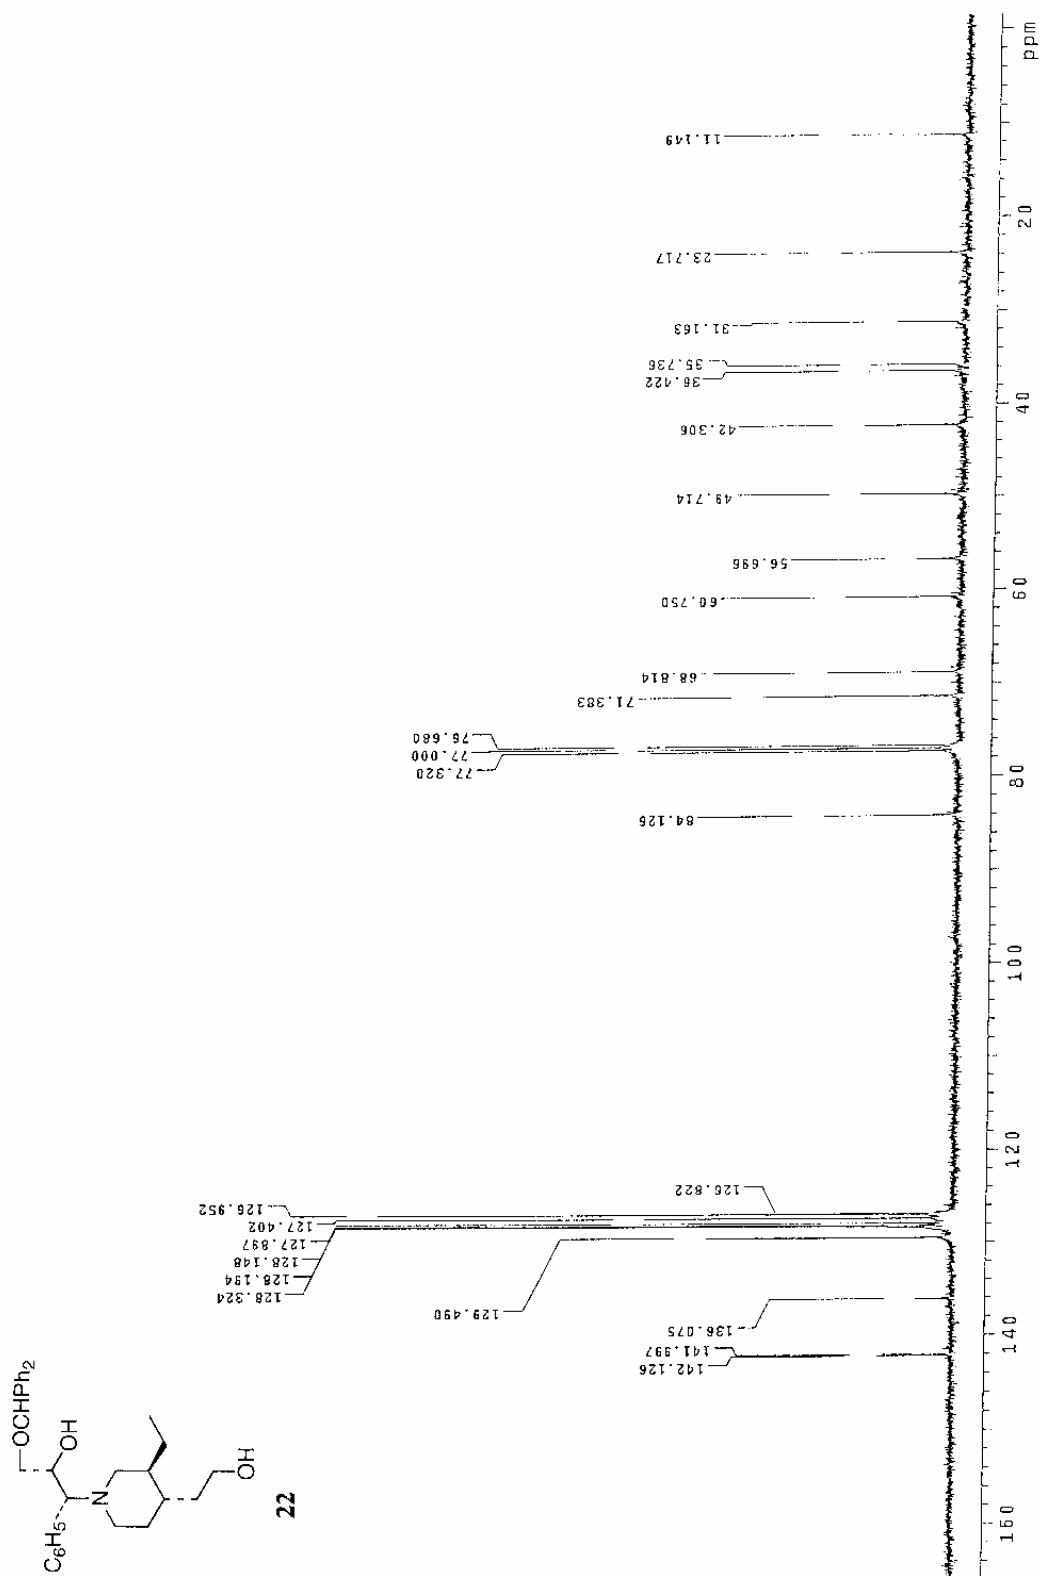

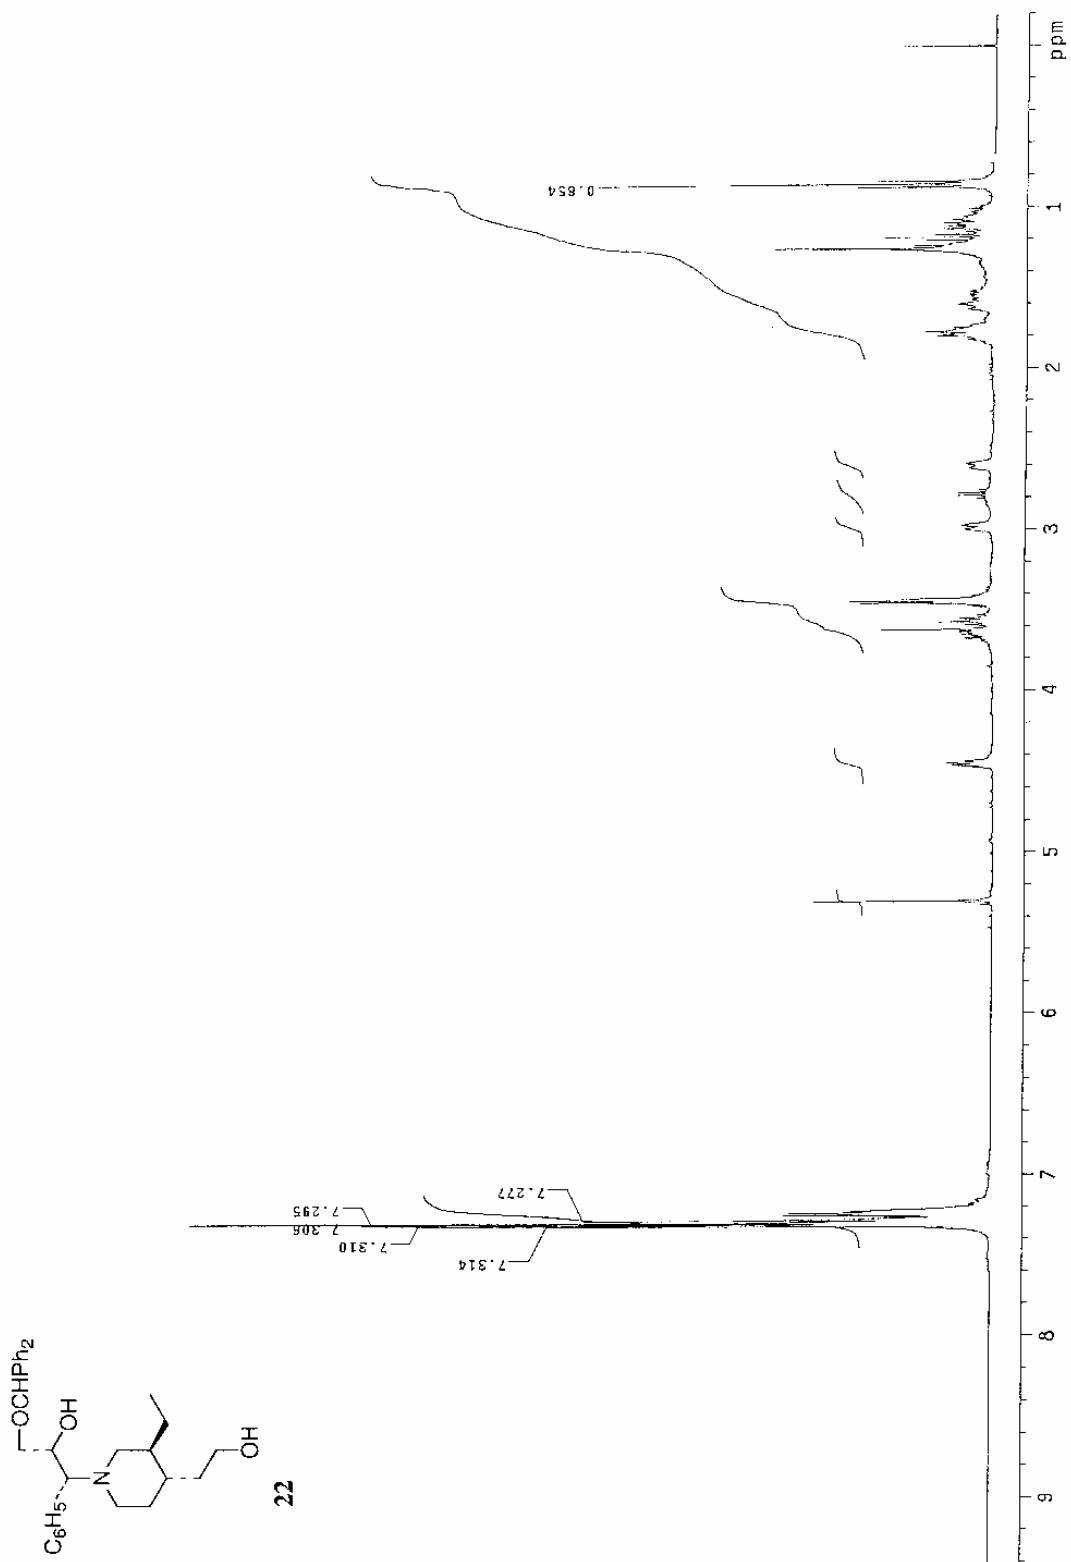

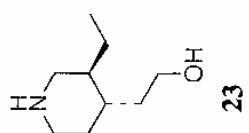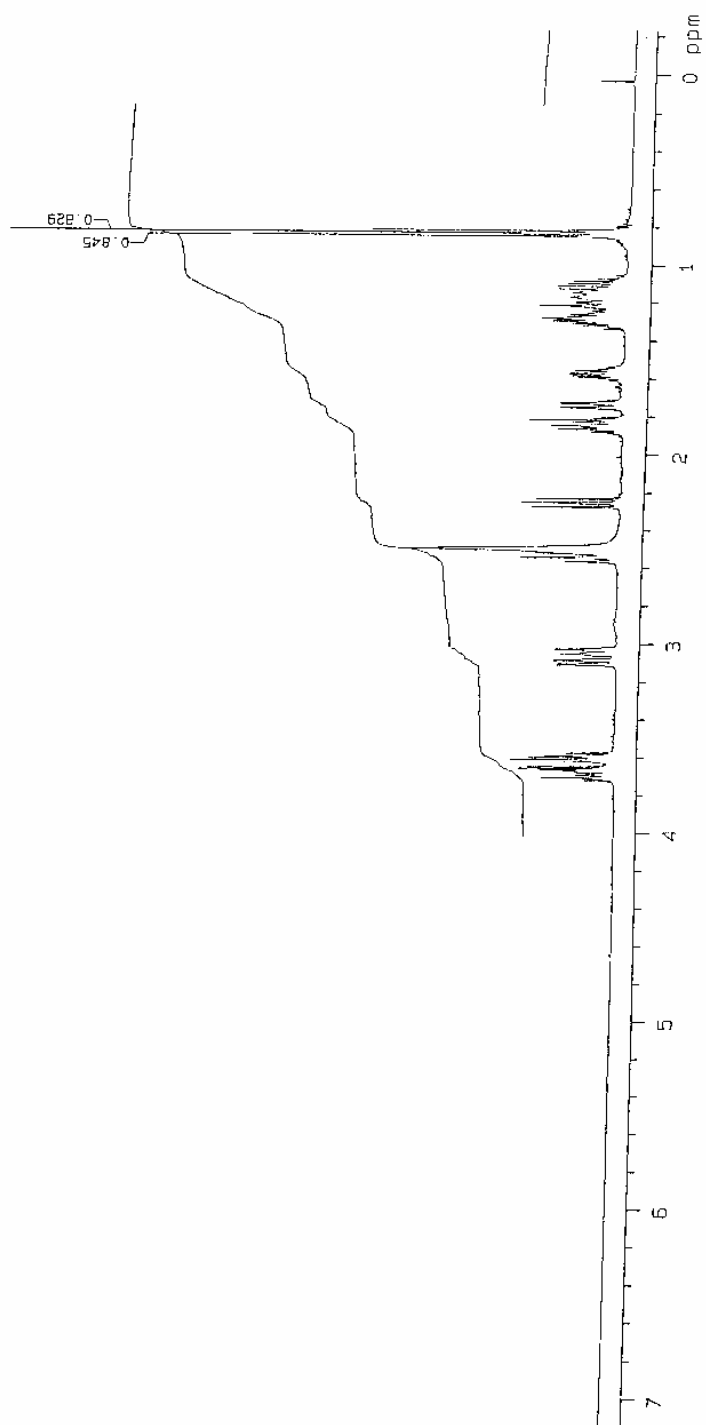

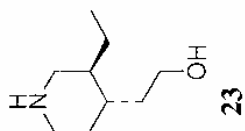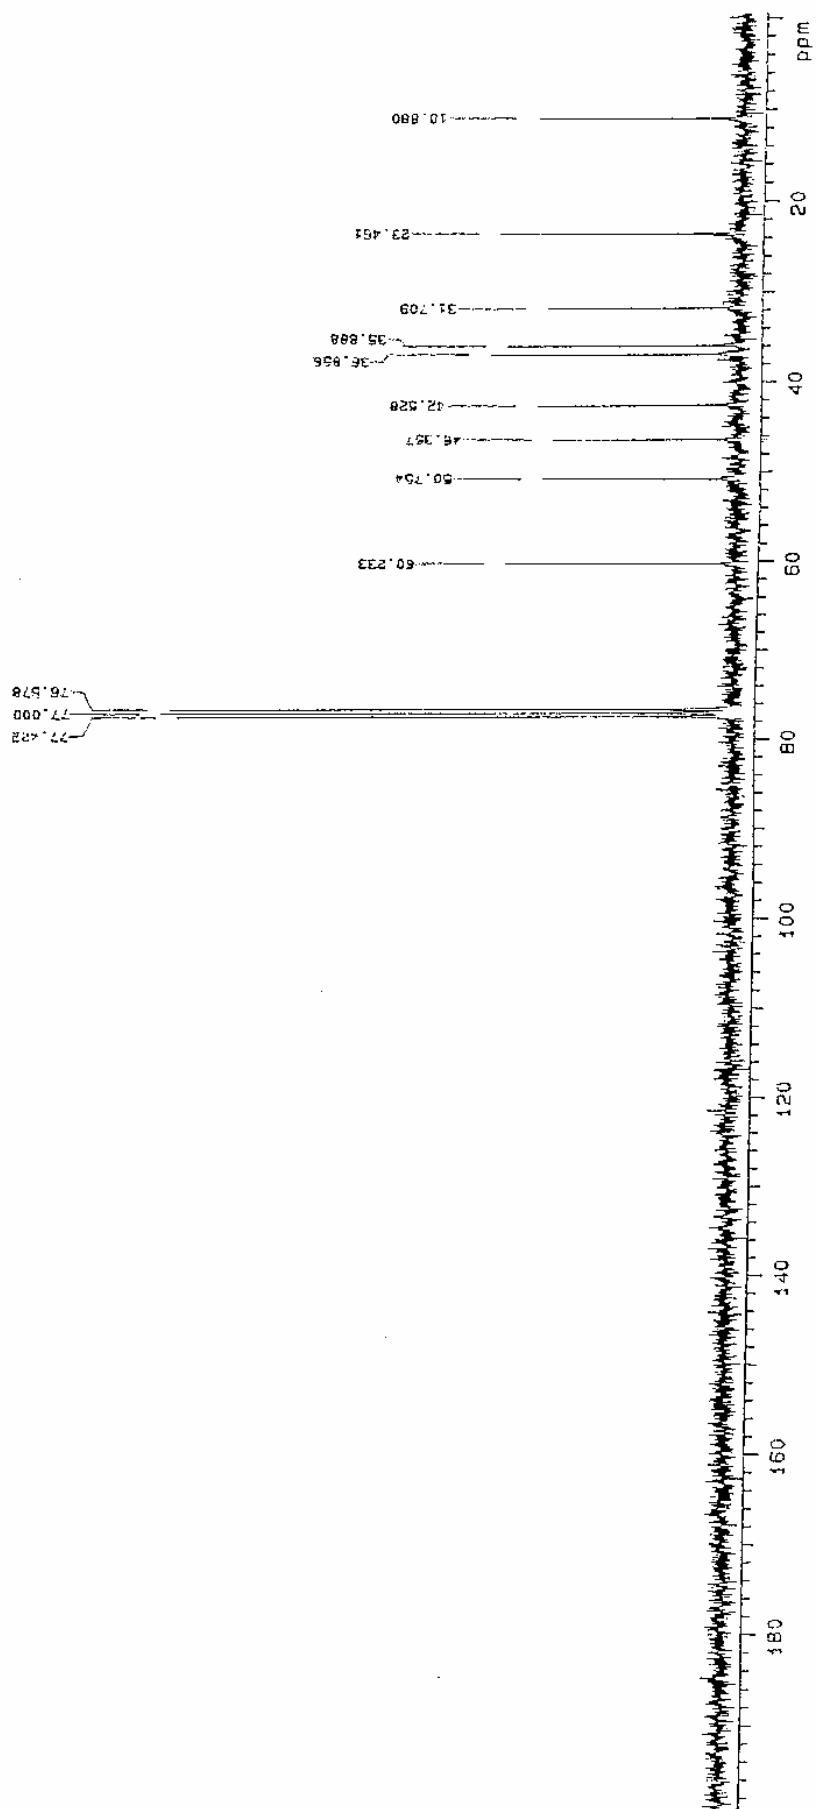

Supplement: b413937b.pdf [file b413937b.pdf]
